# Supplementary material for: The Effect of 4-(Dimethylamino)phenyl-5-oxopyrrolidines on Breast and Pancreatic Cancer Cell Colony Formation, Migration, and Growth of Tumor Spheroids
Source: MDPI journal article supplement (doi:10.3390/ijms25031834), 2024-02-02
Supplement: s1 [file s1]

# **The Effect of 4-(Dimethylamino)phenyl-5-oxopyrrolidines on Breast and Pancreatic Cancer Cell Colony Formation, Migration, and Growth of Tumor Spheroids**

**Karolina Kairytė<sup>1</sup>, Rita Vaickelionienė<sup>1</sup>, Birutė Grybaitė<sup>1</sup>, Kazimieras Anusevičius<sup>1</sup>, Vytautas Mickevičius<sup>1</sup> and Vilma Petrikaitė<sup>2,3,4,\*</sup>**

<sup>1</sup> Department of Organic Chemistry, Kaunas University of Technology, Radvilėnų Rd. 19, LT-50254 Kaunas, Lithuania; karolina.kairyte@ktu.lt (K.K.); rita.vaickelioniene@ktu.lt (R.V.); birute.grybaite@ktu.lt (B.G.); kazimieras.anusevicius@ktu.lt (K.A.); vytautas.mickevicius@ktu.lt (V.M.)

<sup>2</sup> Institute of Biotechnology, Life Sciences Center, Vilnius University, Saulėtekio Al. 7, LT-10257 Vilnius, Lithuania

<sup>3</sup> Faculty of Medicine, Lithuanian University of Health Sciences, A. Mickevičiaus 9, LT-44307 Kaunas, Lithuania

<sup>4</sup> Laboratory of Drug Targets Histopathology, Institute of Cardiology, Lithuanian University of Health Sciences, Sukilėlių Pr. 13, LT-50162 Kaunas, Lithuania

\* Correspondence: vilma.petrikaite@lsmuni.lt or vilma.petrikaite@bti.vu.lt; Tel.: +370-68629383

4-(1H-benzo[d]imidazol-2-yl)-1-(4-(dimethylamino)phenyl)pyrrolidin-2-one (3a)

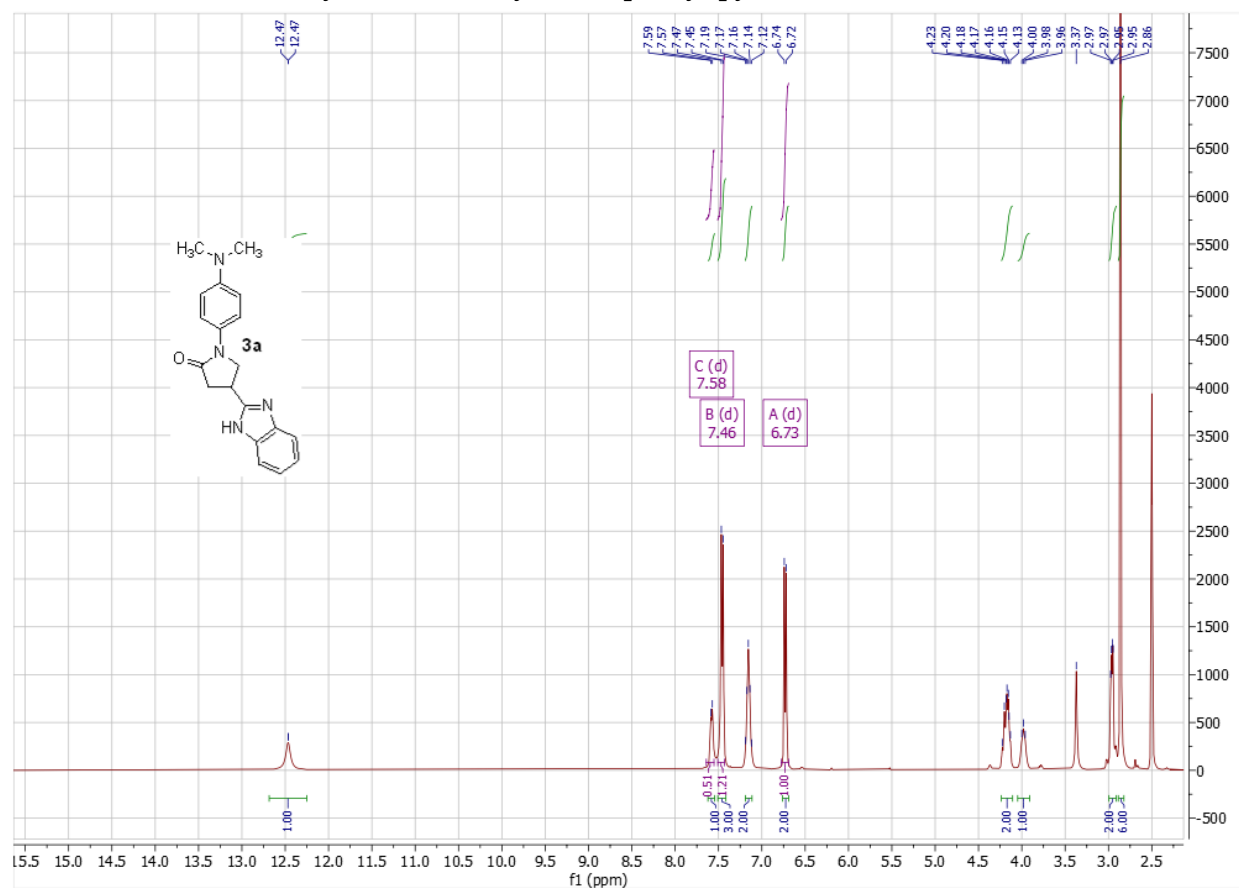

Figure S1. <sup>1</sup>H NMR spectrum of compound 3a.

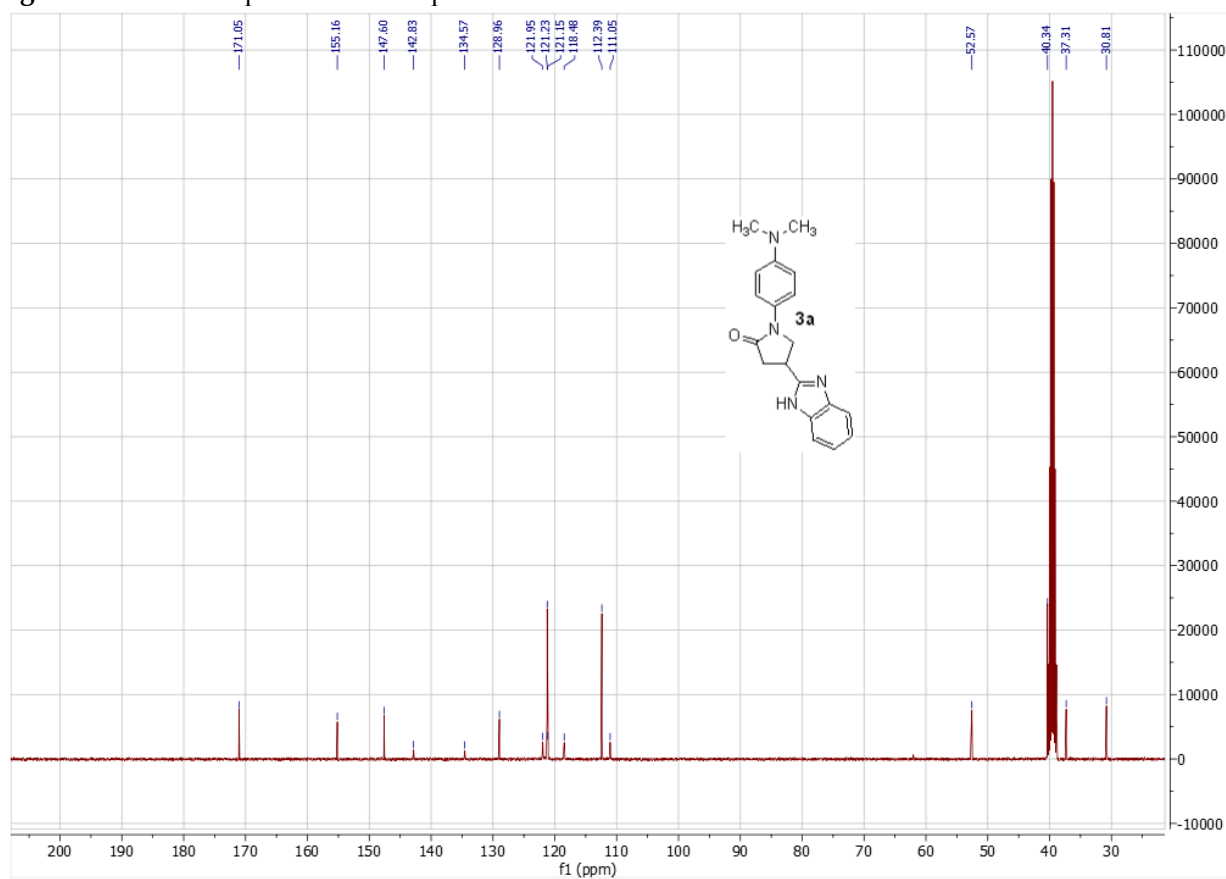

Figure S2. <sup>13</sup>C NMR spectrum of compound 3a.

1-(4-(Dimethylamino)phenyl)-4-(5-fluoro-1H-benzo[d]imidazol-2-yl)pyrrolidin-2-one (3b)

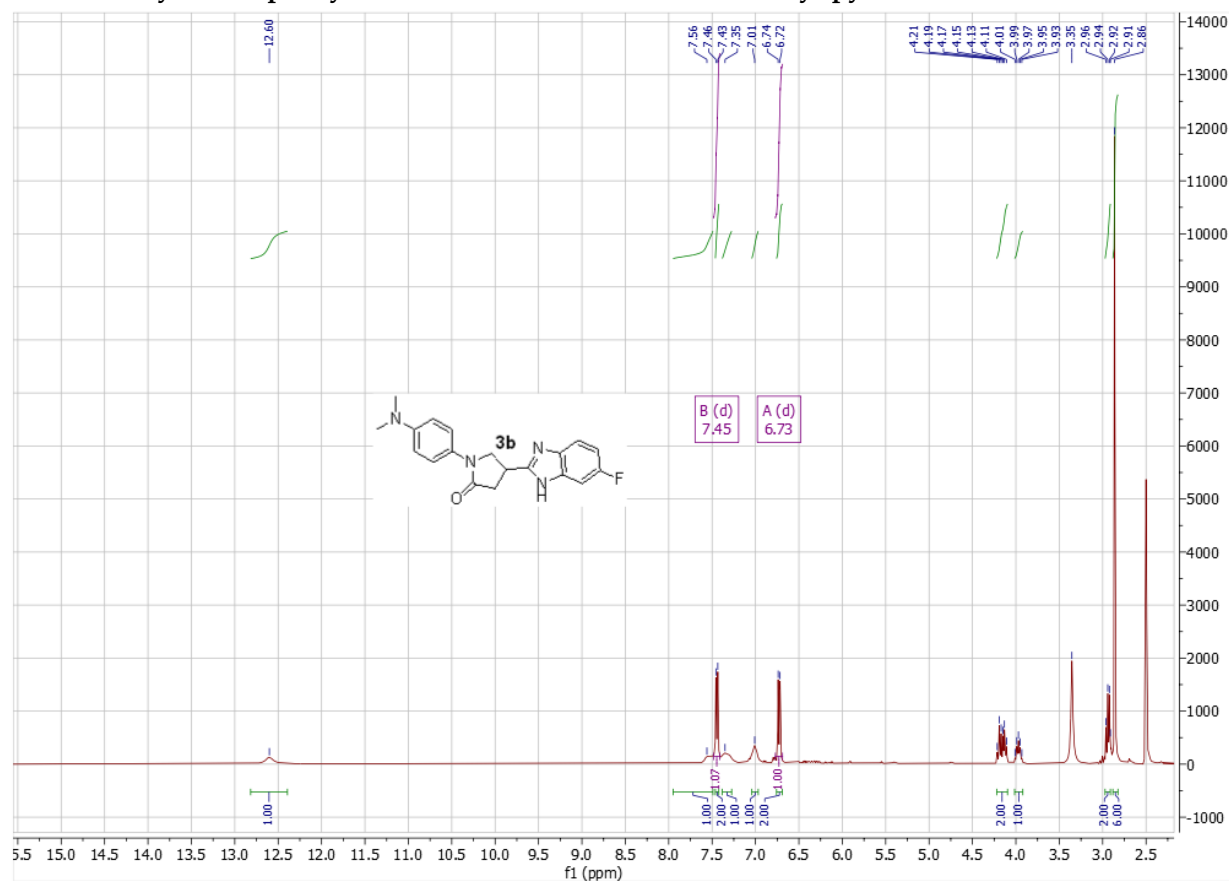

Figure S3.  $^1\text{H}$  NMR spectrum of compound 3b.

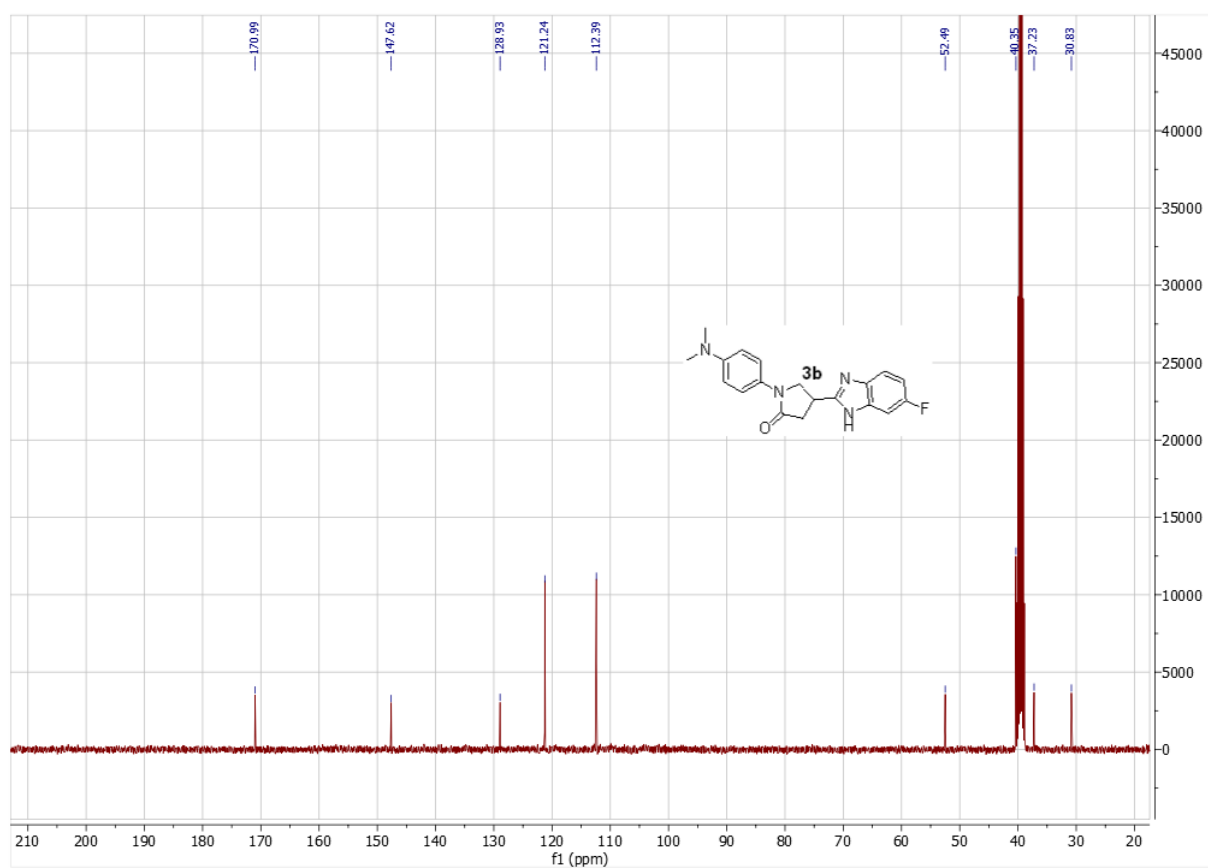

Figure S4.  $^{13}\text{C}$  NMR spectrum of compound 3b.

1-(4-(Dimethylamino)phenyl)-4-(5-chloro-1H-benzo[d]imidazol-2-yl)pyrrolidin-2-one (3c)

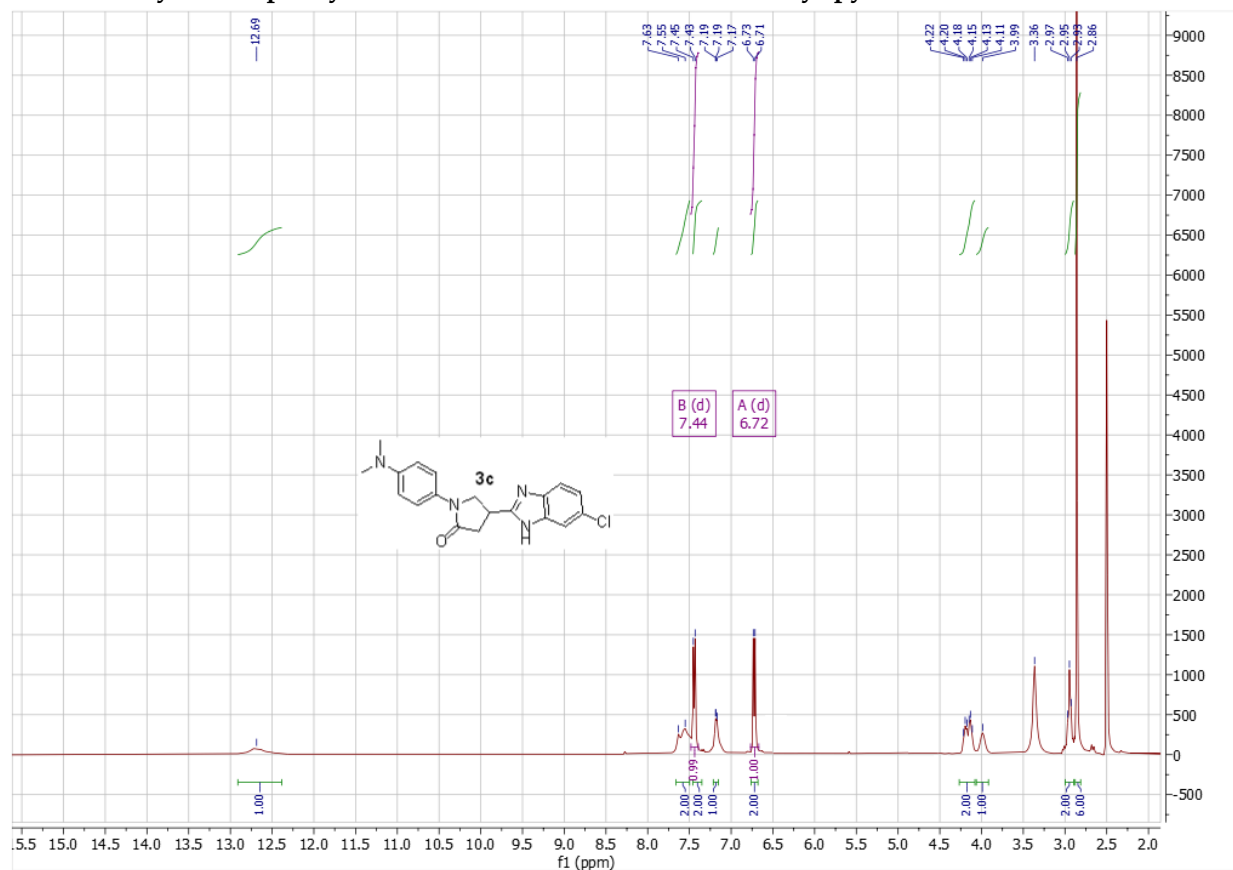

Figure S5. <sup>1</sup>H NMR spectrum of compound 3c.

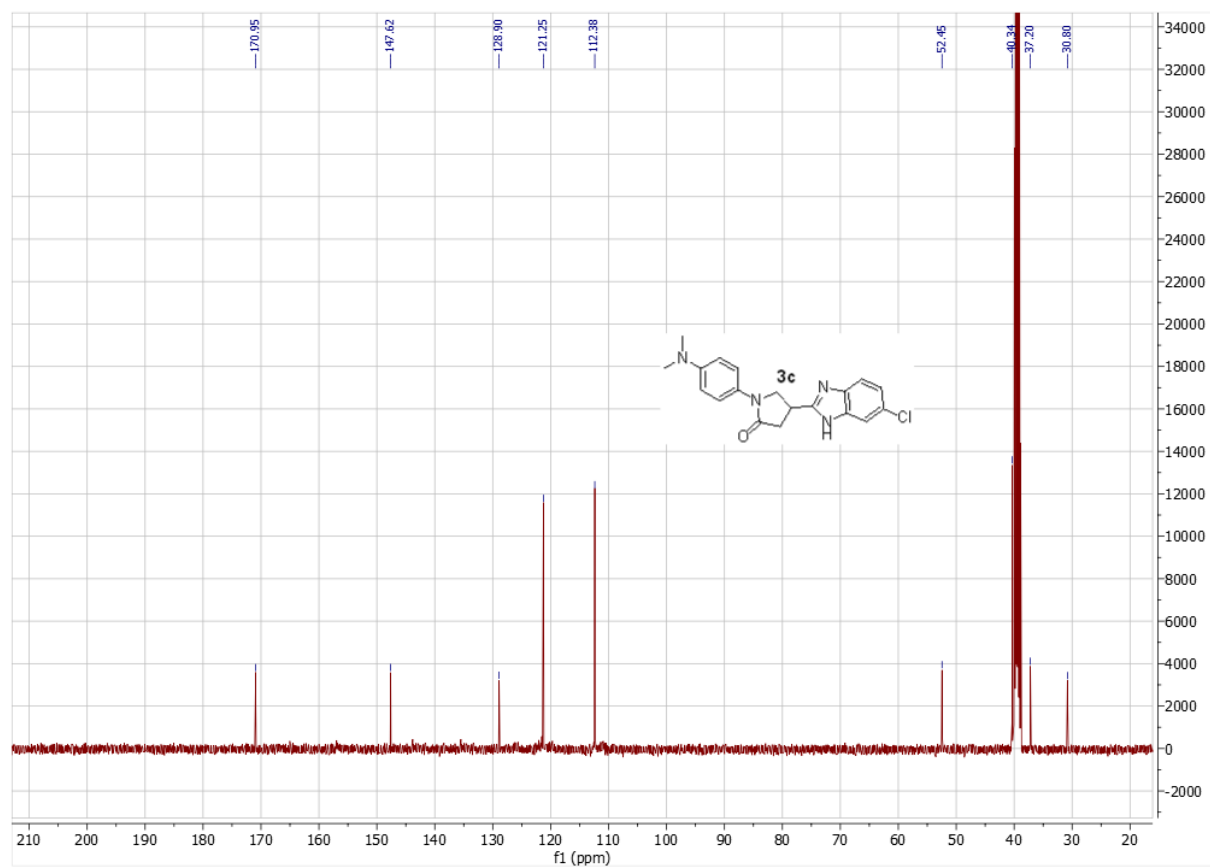

Figure S6. <sup>13</sup>C NMR spectrum of compound 3c.

1-(4-(Dimethylamino)phenyl)-4-(5-methyl-1H-benzo[d]imidazol-2-yl)pyrrolidin-2-one (3d)

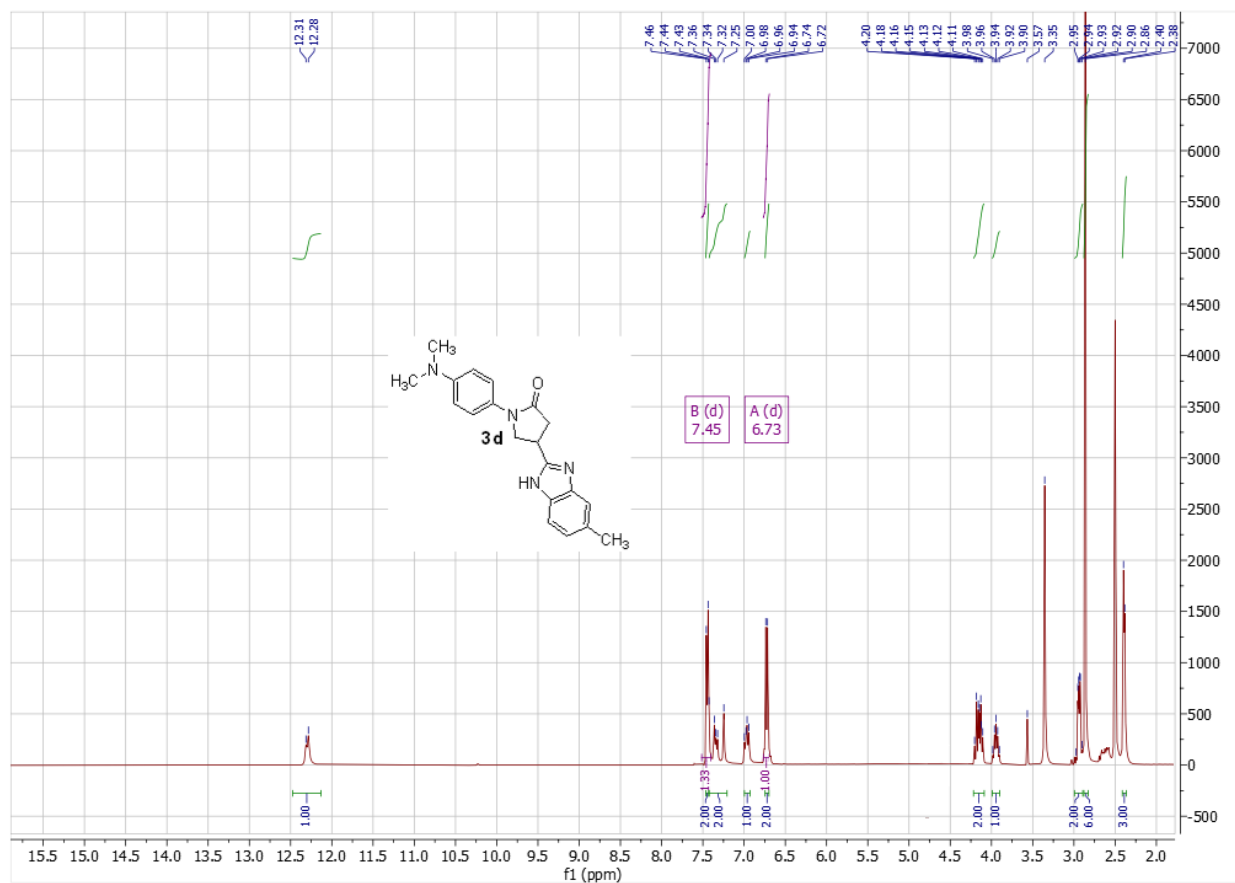

Figure S7. <sup>1</sup>H NMR spectrum of compound 3d.

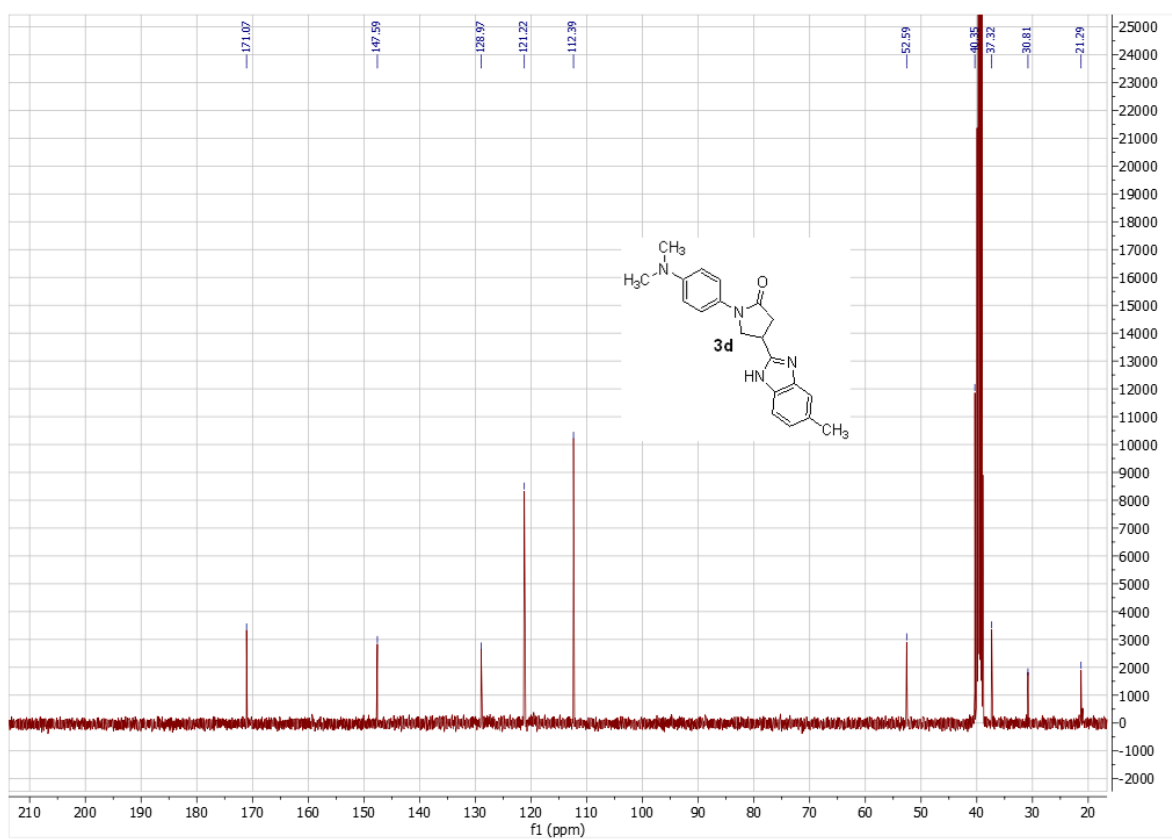

Figure S8. <sup>13</sup>C NMR spectrum of compound 3d.

**1-(4-(Dimethylamino)phenyl)-5-oxopyrrolidine-3-carbohydrazide (4)**

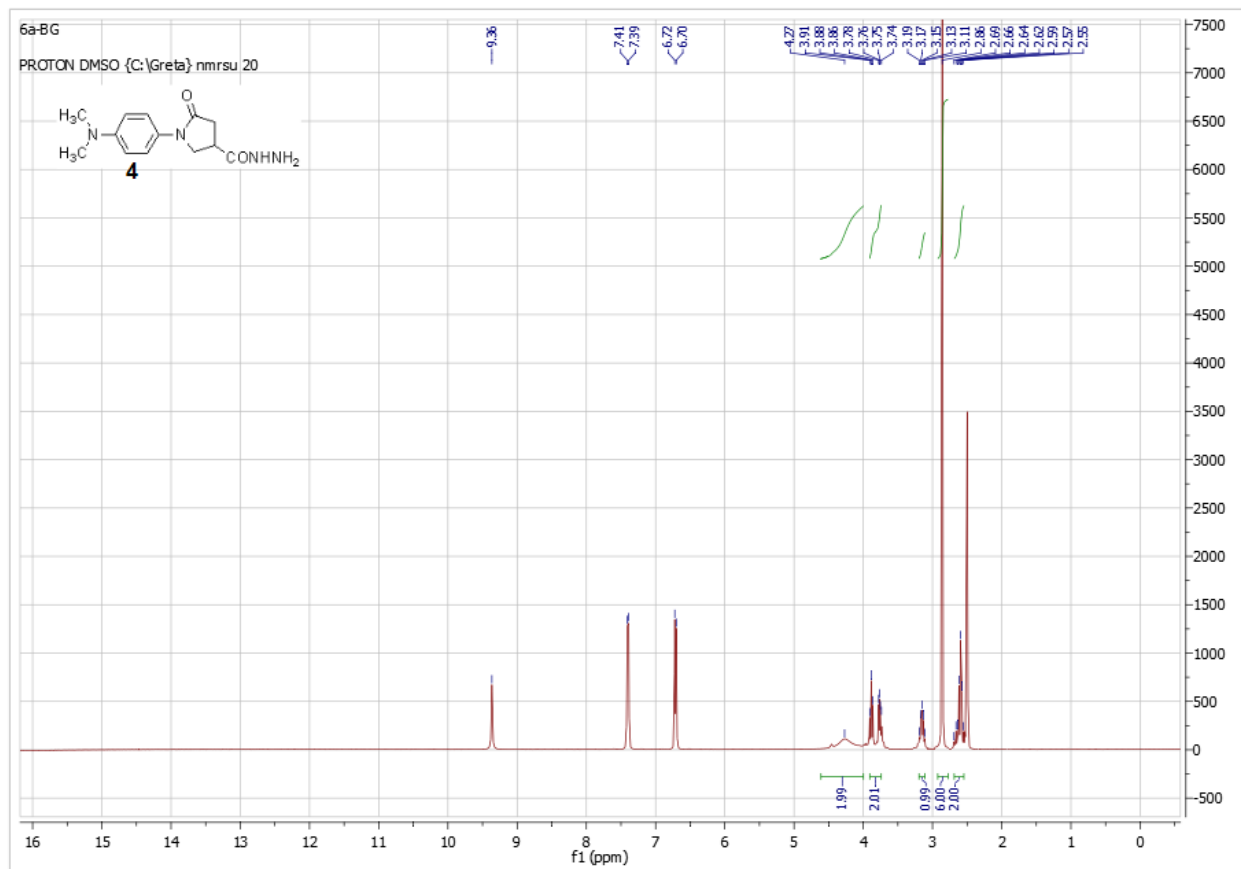

**Figure S9.**  $^1\text{H}$  NMR spectrum of compound 4.

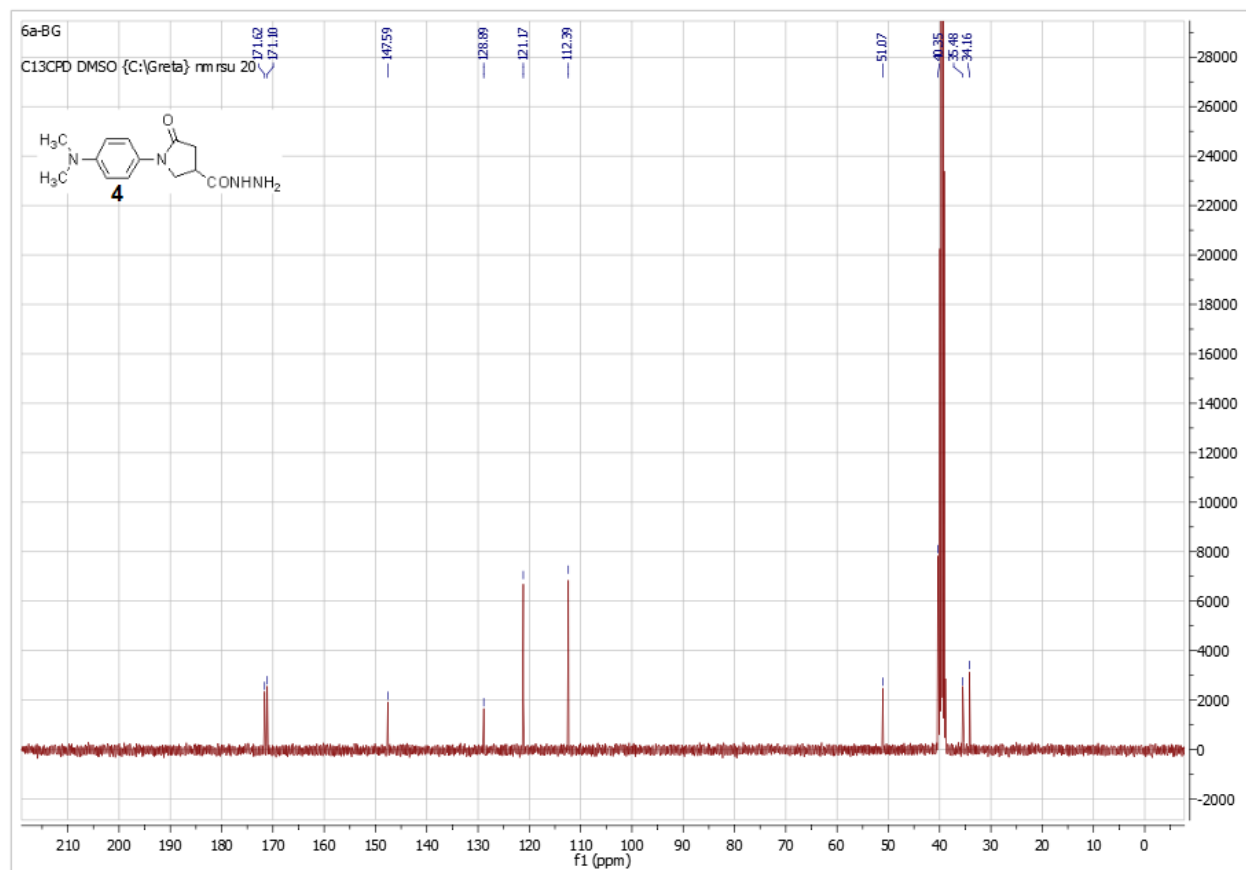

**Figure S10.**  $^{13}\text{C}$  NMR spectrum of compound 4.

***N'*-benzylidene-1-(4-(dimethylamino)phenyl)-5-oxopyrrolidine-3-carbohydrazide (5a)**

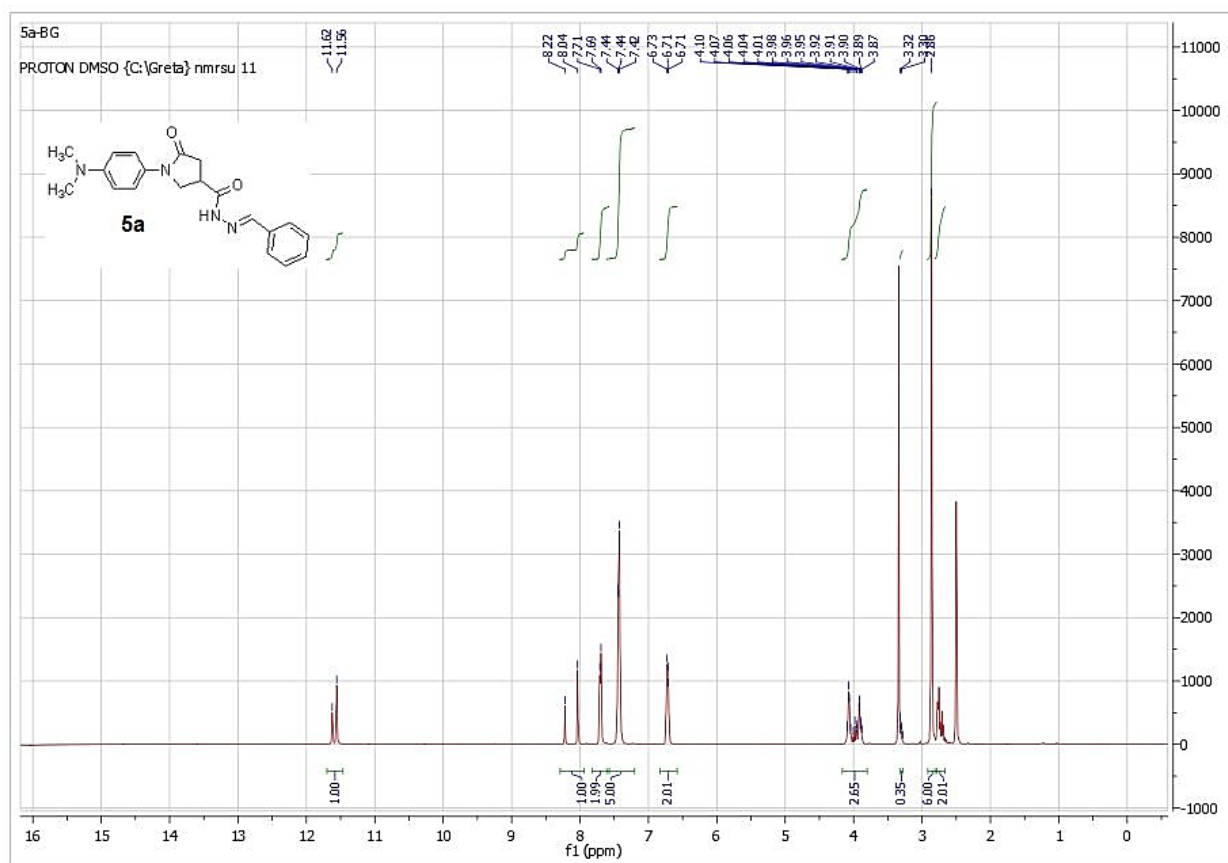

**Figure S11.**  $^1\text{H}$  NMR spectrum of compound **5a**.

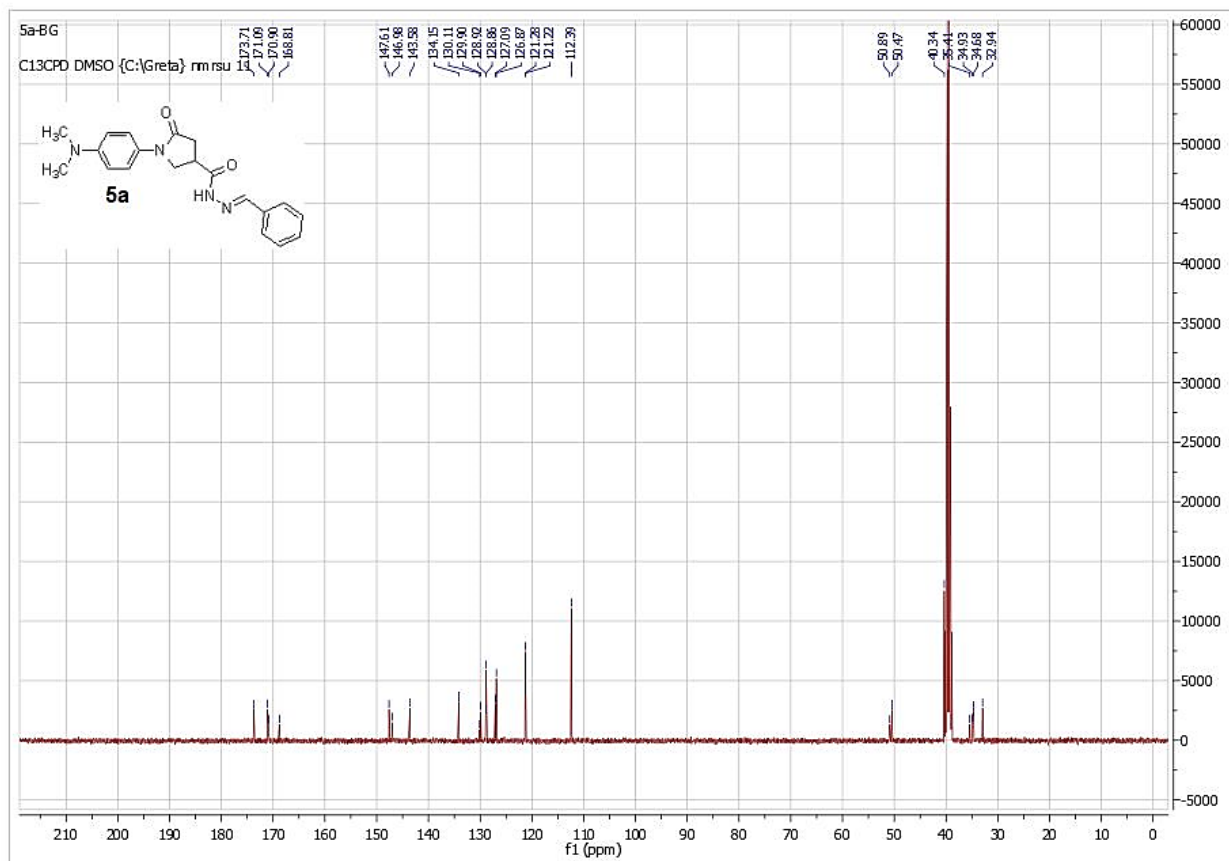

**Figure S12.**  $^{13}\text{C}$  NMR spectrum of compound **5a**.

***N'*-(4-chlorobenzylidene)-1-(4-(dimethylamino)phenyl)-5-oxopyrrolidine-3-carbohydrazide (5b)**

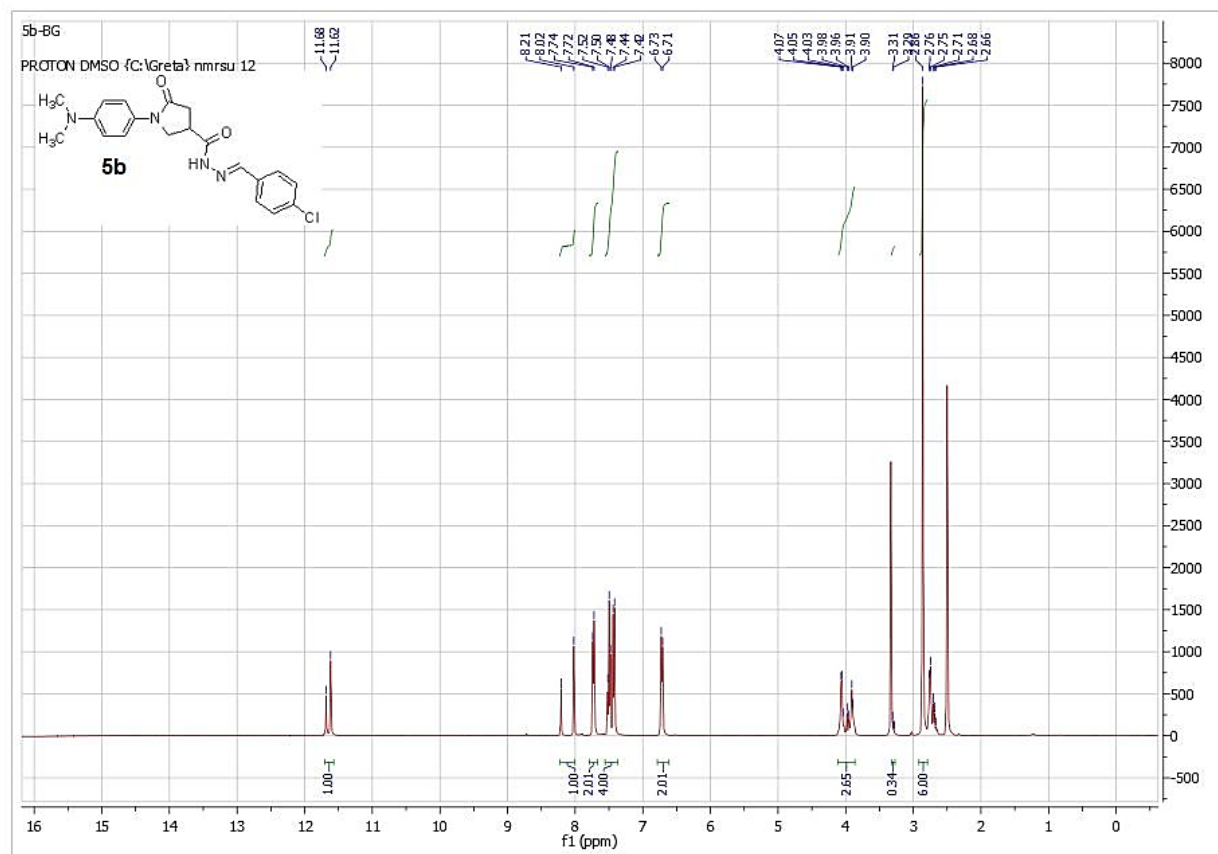

**Figure S13.**  $^1\text{H}$  NMR spectrum of compound **5b**.

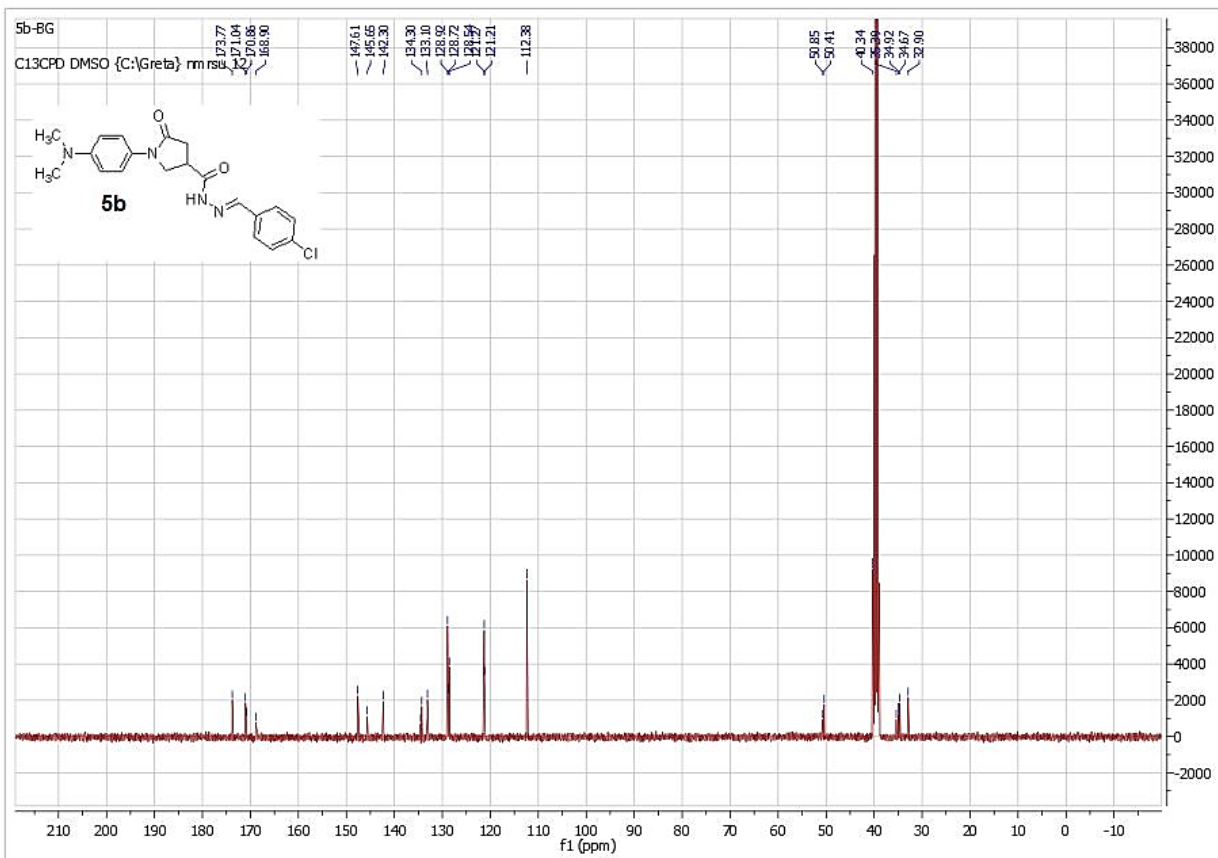

**Figure S14.**  $^{13}\text{C}$  NMR spectrum of compound **5b**.



***N'*-(4-bromobenzylidene)-1-(4-(dimethylamino)phenyl)-5-oxopyrrolidine-3-carbohydrazide (5c)**

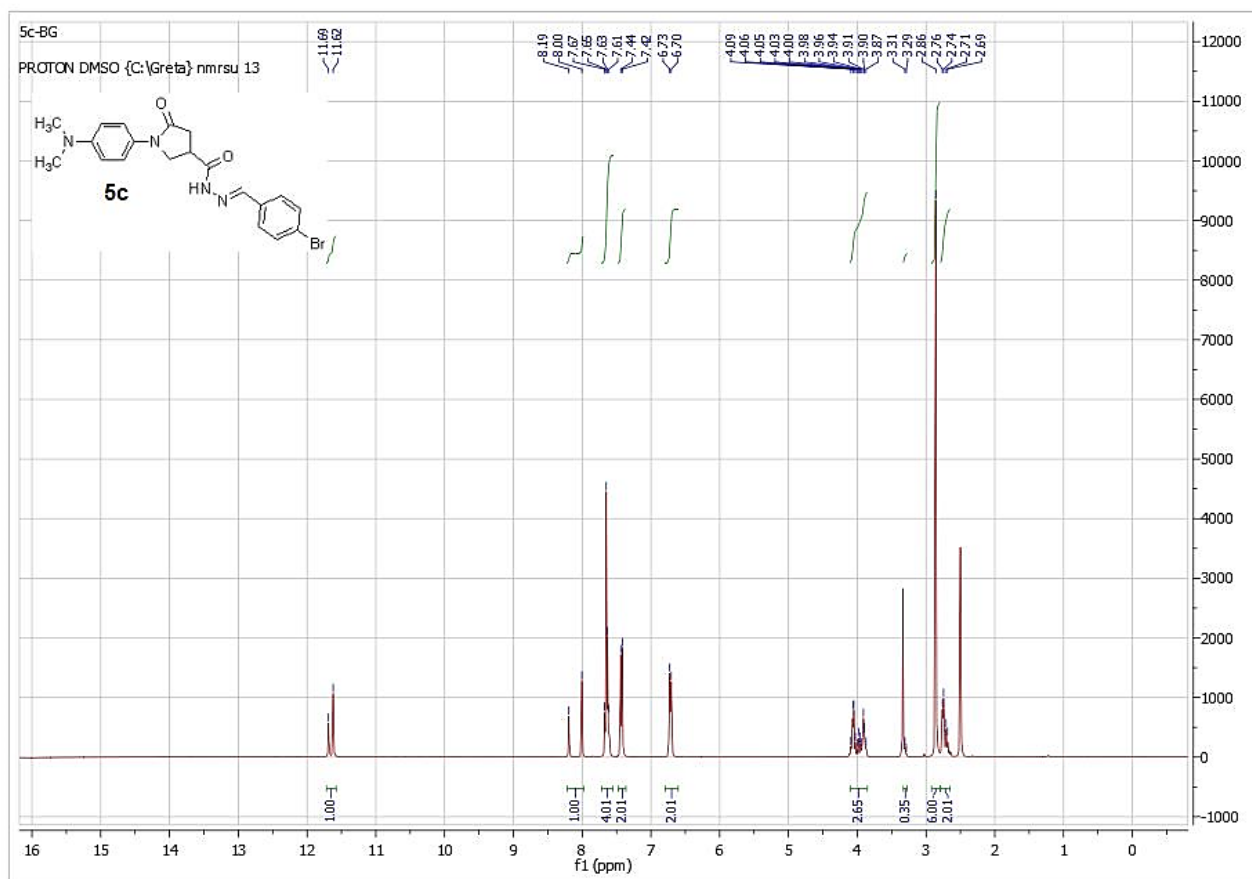

**Figure S15.**  $^1\text{H}$  NMR spectrum of compound **5c**.

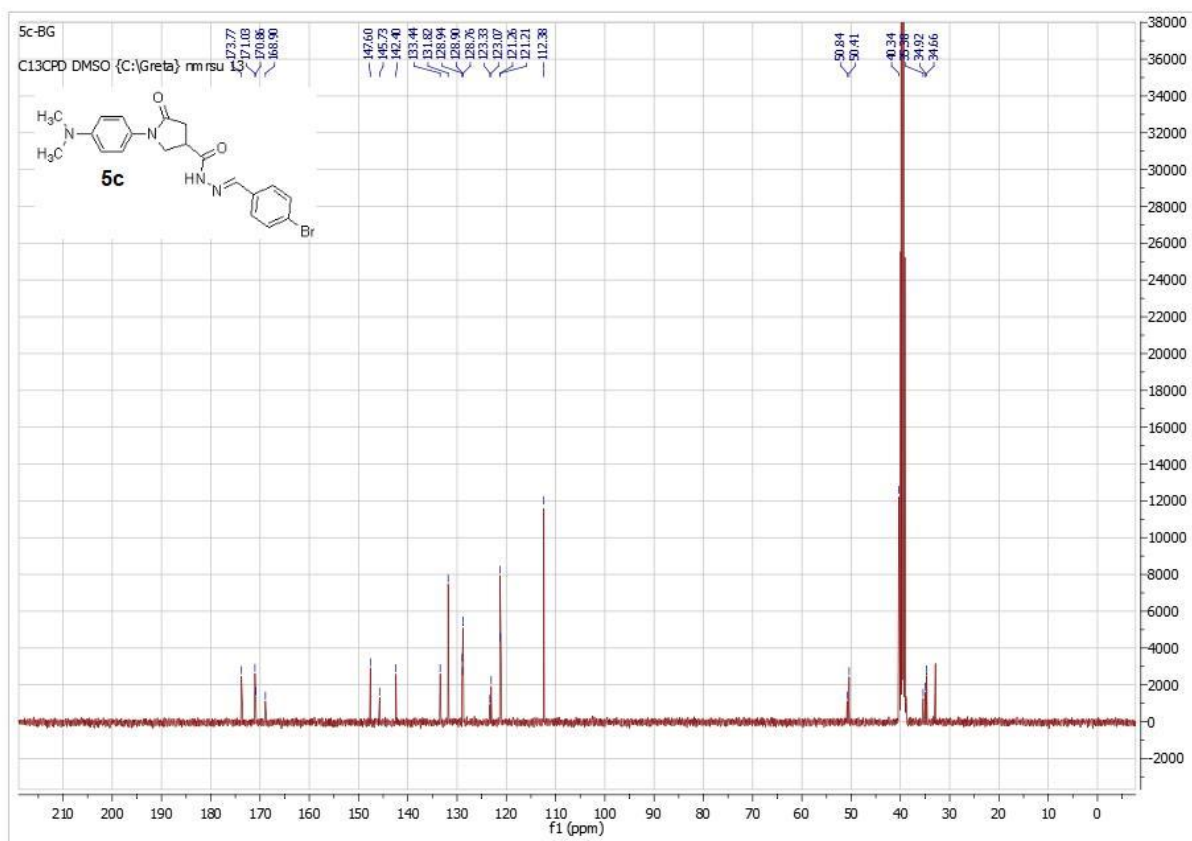

**Figure S16.**  $^{13}\text{C}$  NMR spectrum of compound **5c**.

***N'*-((4-dimethylamino)benzylidene)-1-(4-(dimethylamino)phenyl)-5-oxopyrrolidine-3-carbohydrazide (5d)**

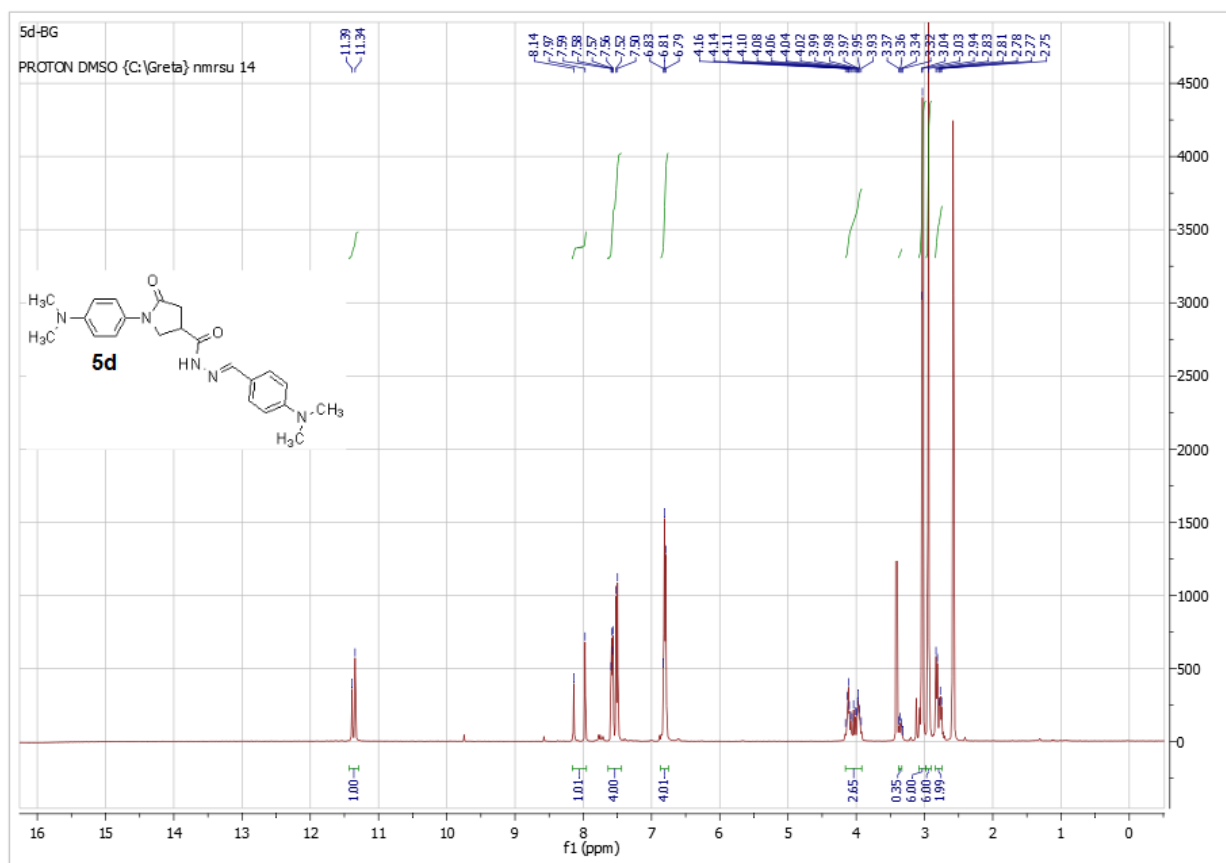

**Figure S17.** <sup>1</sup>H NMR spectrum of compound **5d**.

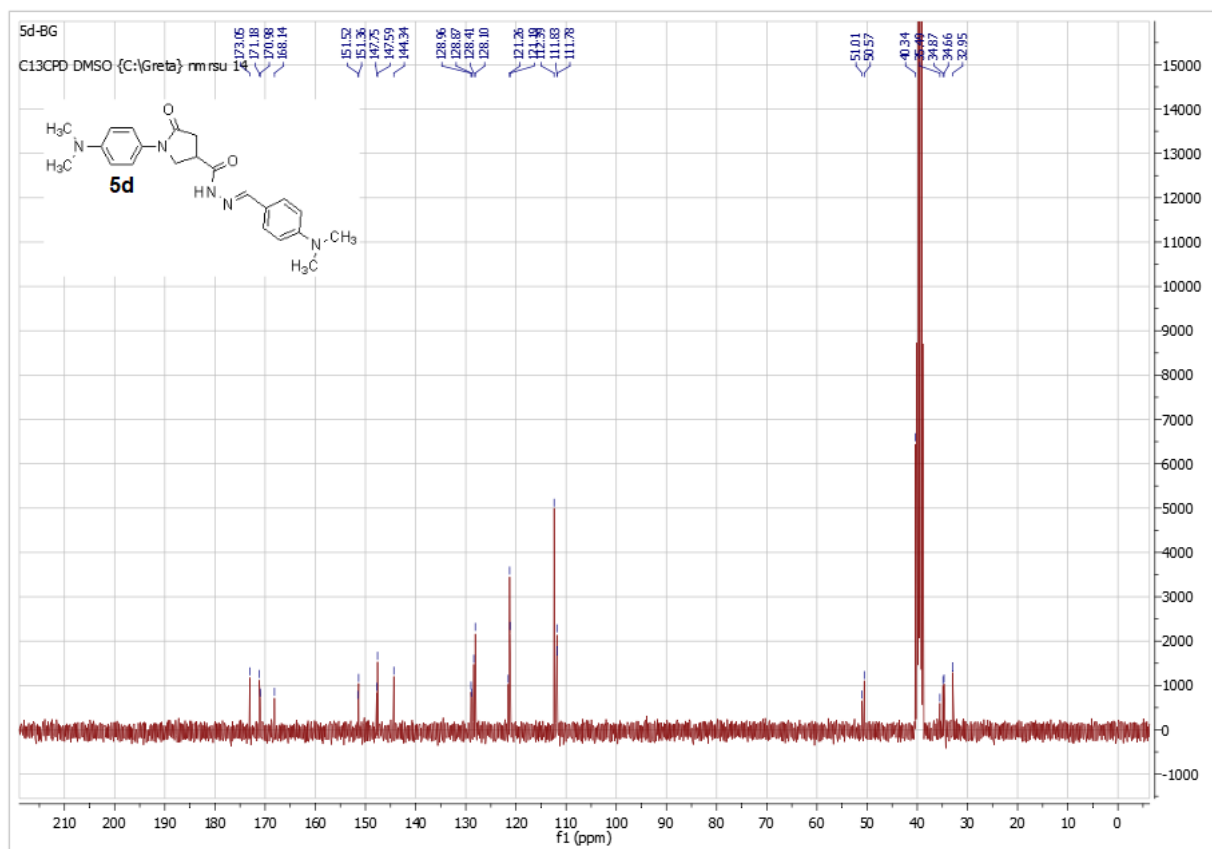

**Figure S18.** <sup>13</sup>C NMR spectrum of compound **5d**.

***N'*-(4-methoxybenzylidene)-1-(4-(dimethylamino)phenyl)-5-oxopyrrolidine-3-carbohydrazide (5e)**

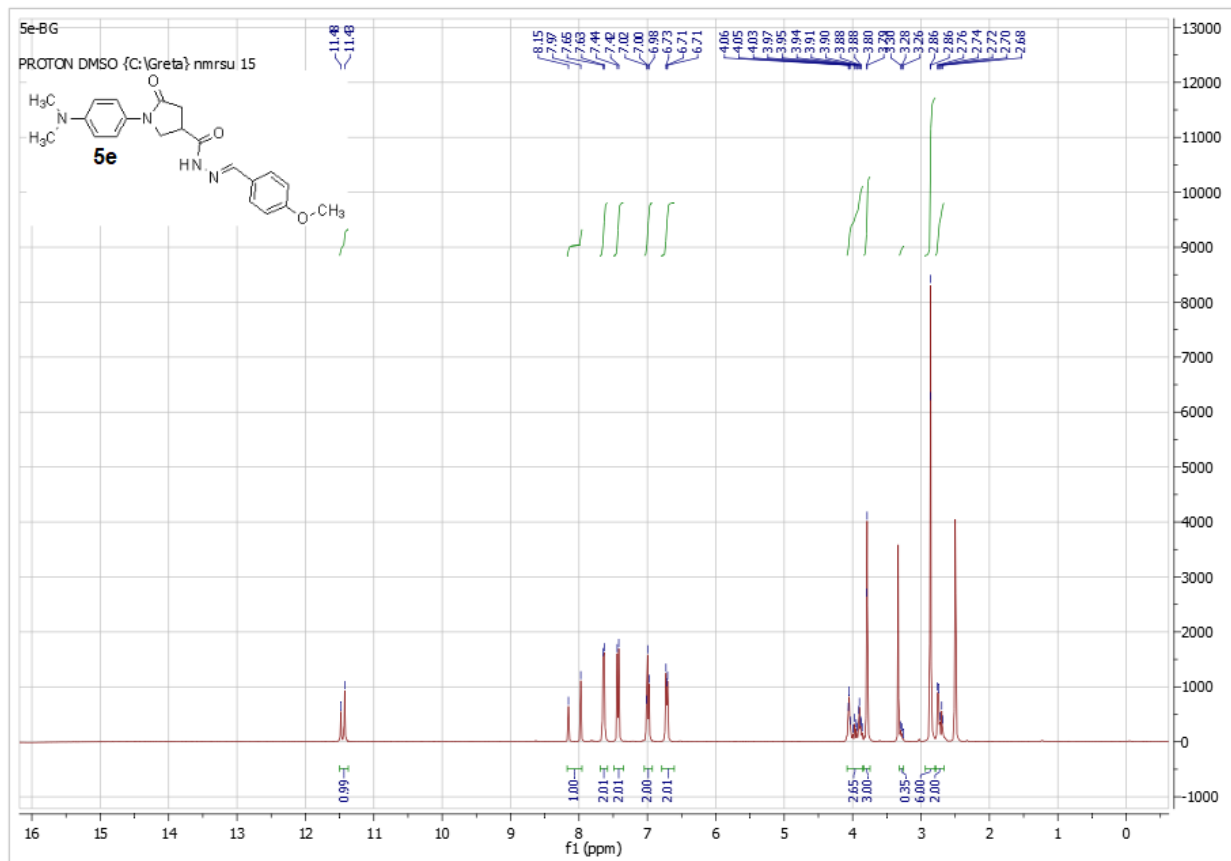

**Figure S19.**  $^1\text{H}$  NMR spectrum of compound **5e**.

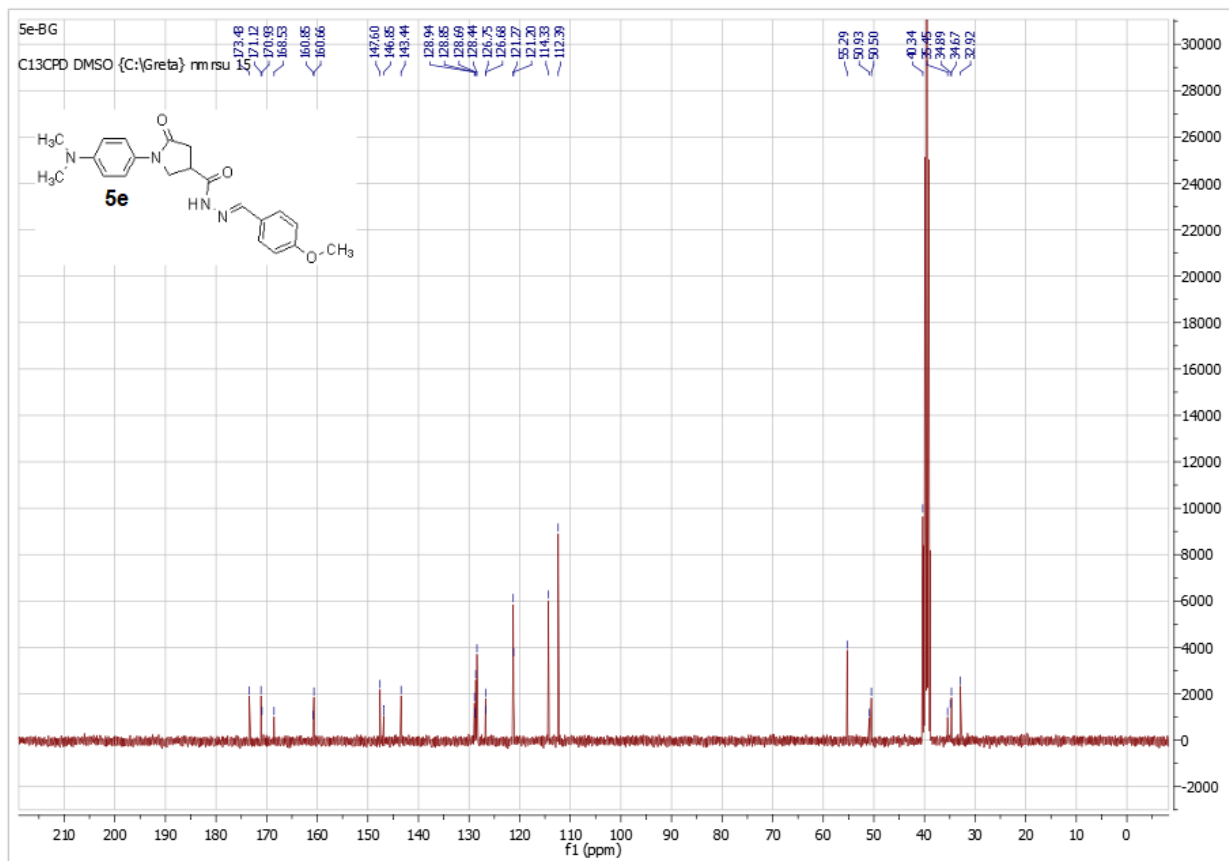

**Figure S20.**  $^{13}\text{C}$  NMR spectrum of compound **5e**.

*N'*-(2,5-dimethoxybenzylidene)-1-(4-(dimethylamino)phenyl)-5-oxopyrrolidine-3-carbohydrazide (**5f**)

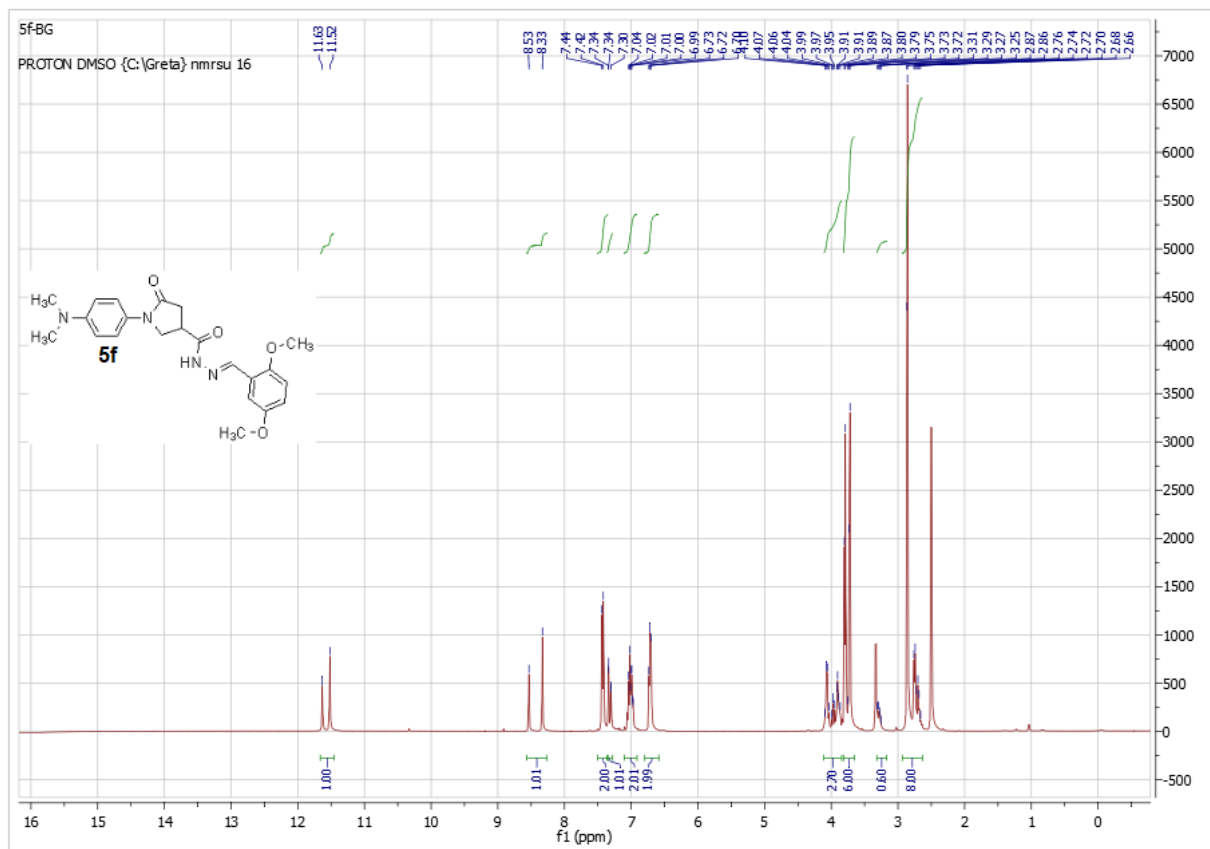

Figure S21. <sup>1</sup>H NMR spectrum of compound **5f**.

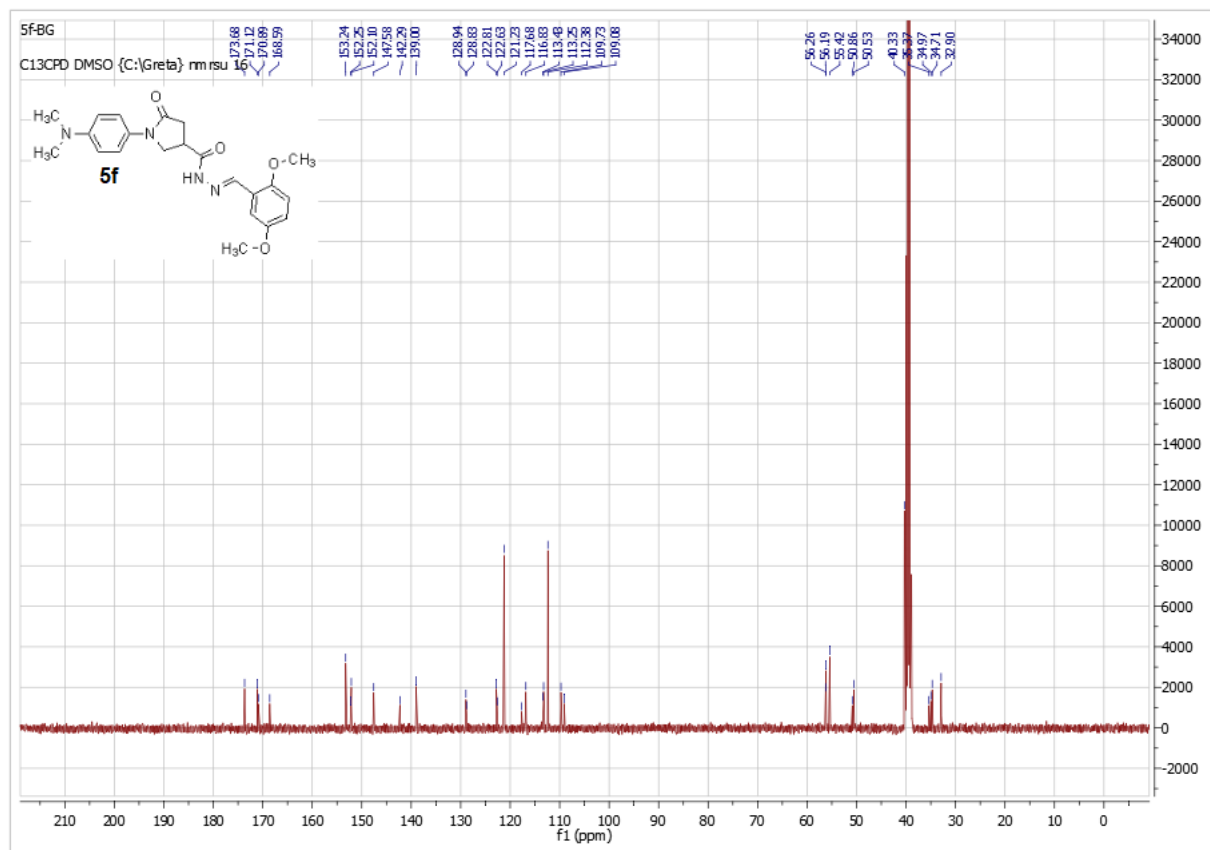

Figure S22. <sup>13</sup>C NMR spectrum of compound **5f**.

***N'*-(2,4,6-trimethoxybenzylidene)-1-(4-(dimethylamino)phenyl)-5-oxopyrrolidine-3-carbohydrazide (5g)**

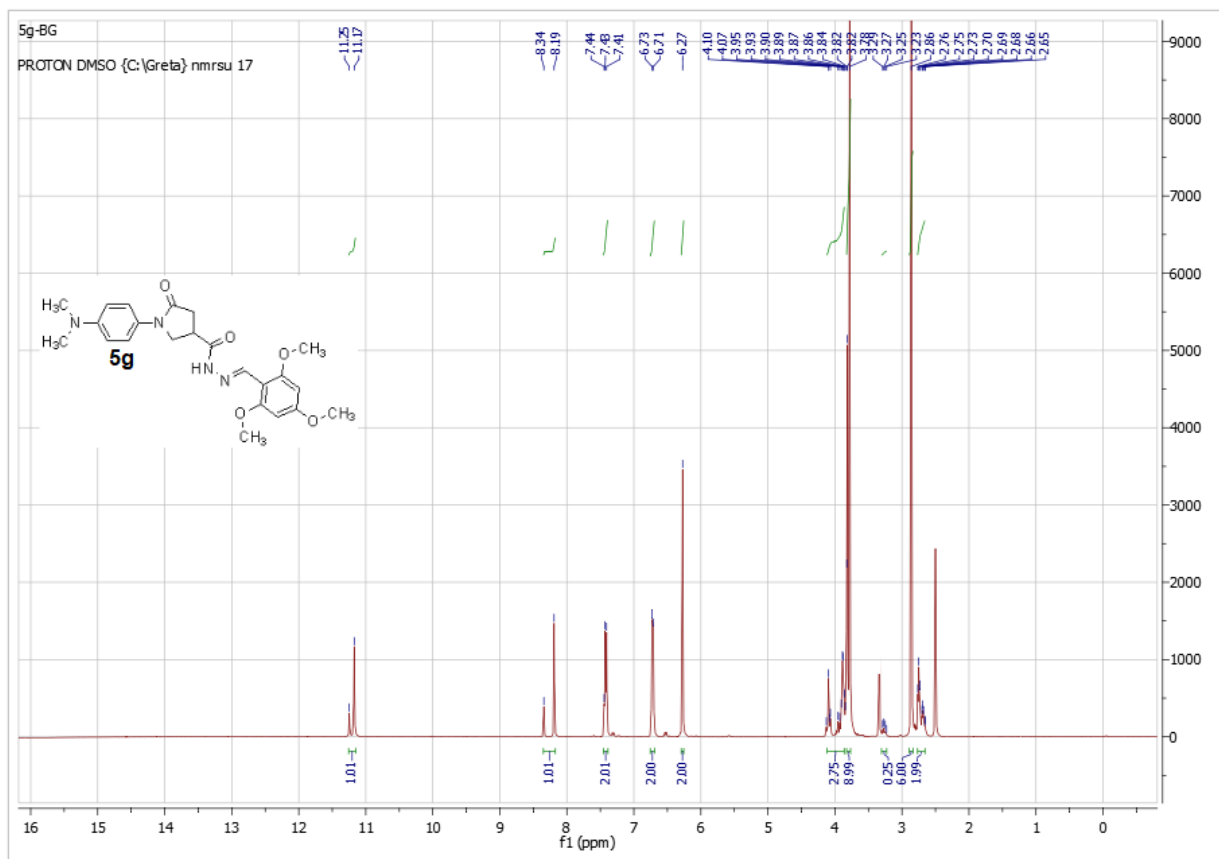

**Figure S23.**  $^1\text{H}$  NMR spectrum of compound **5g**.

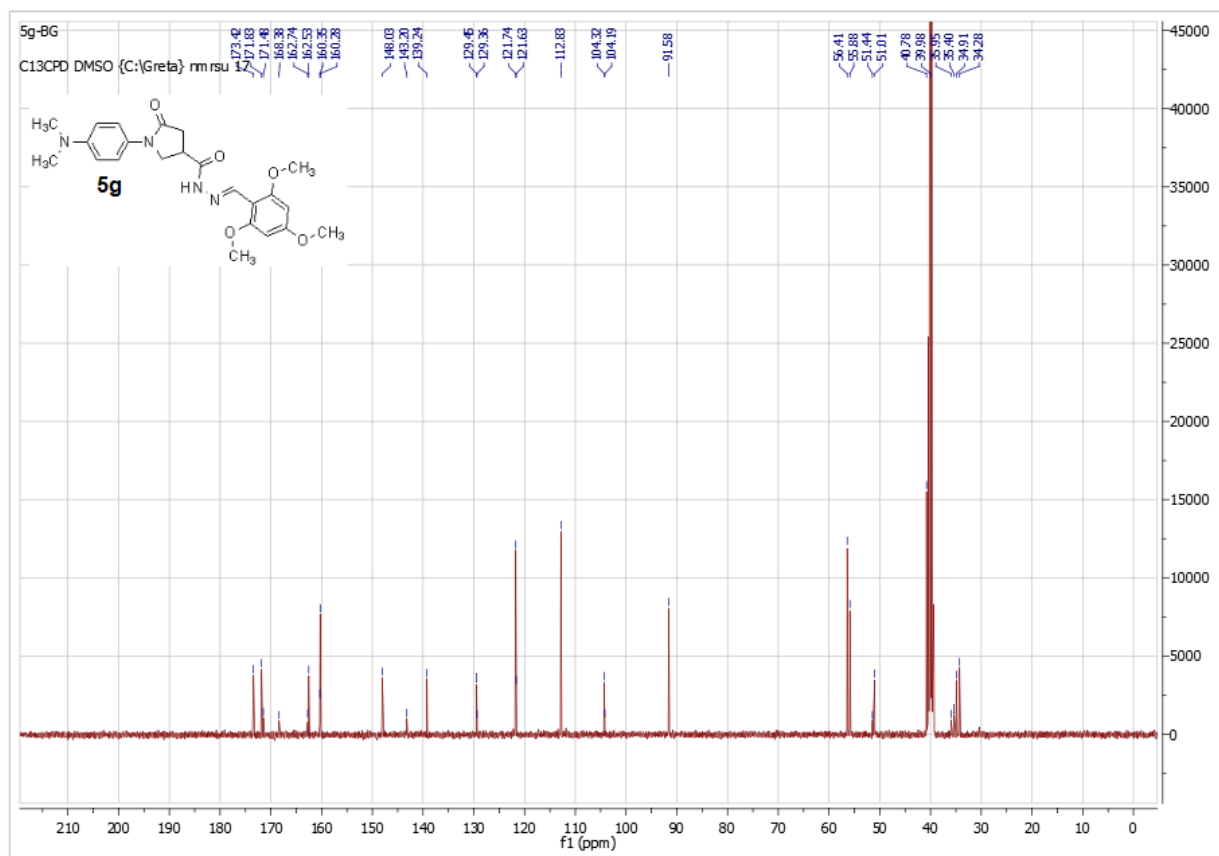

**Figure S24.**  $^{13}\text{C}$  NMR spectrum of compound **5g**.

***N'*-(3,4,5-trimethoxybenzylidene)-1-(4-(dimethylamino)phenyl)-5-oxopyrrolidine-3-carbohydrazide (5h)**

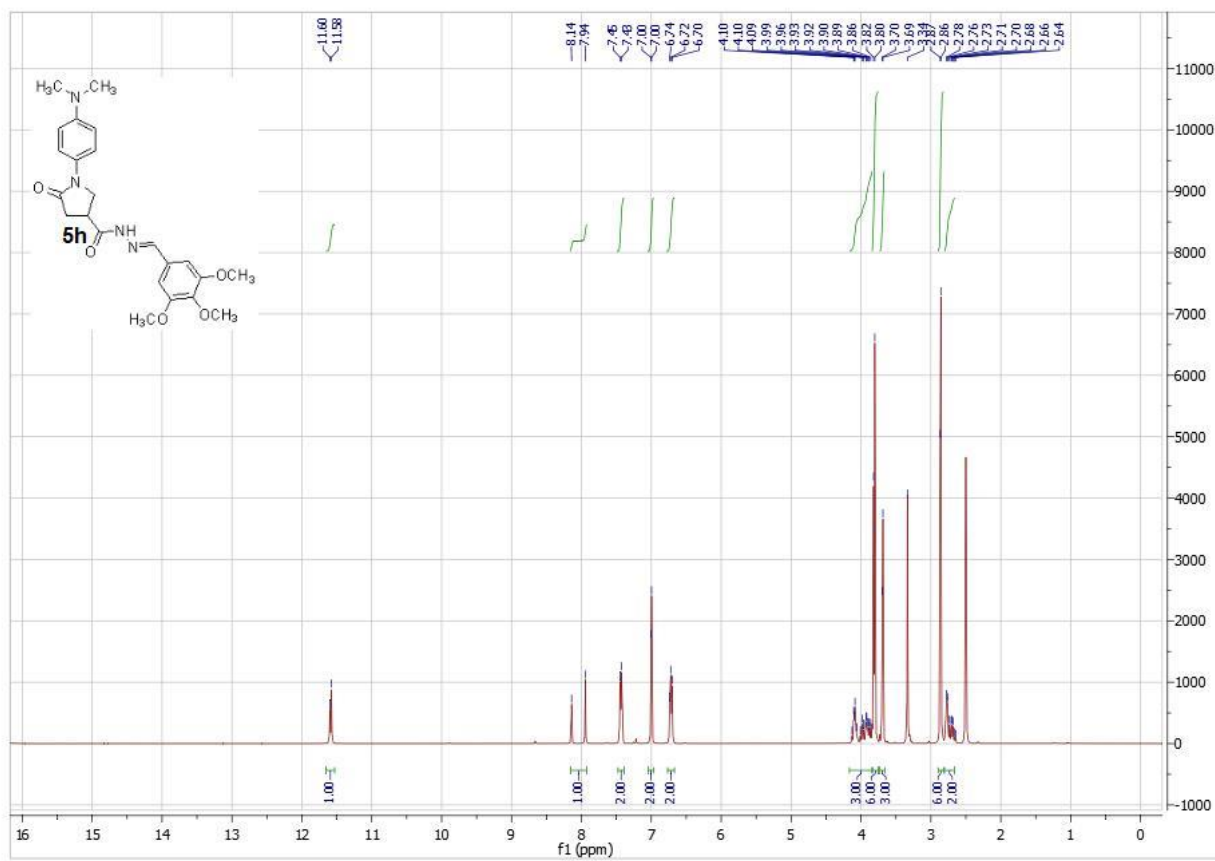

**Figure S25.** <sup>1</sup>H NMR spectrum of compound 5h.

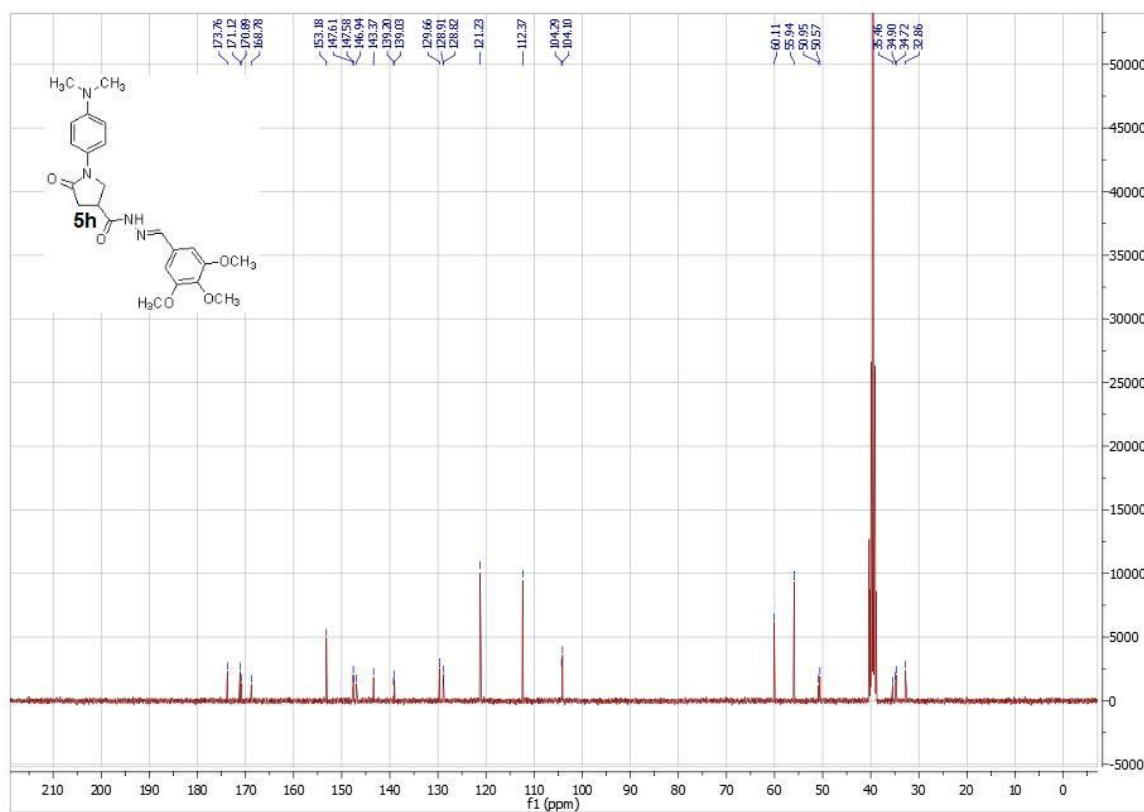

**Figure S26.** <sup>13</sup>C NMR spectrum of compound 5h.

1-(4-(Dimethylamino)phenyl)-N'-(4-nitrobenzylidene)-5-oxopyrrolidine-3-carbohydrazide (**5i**)

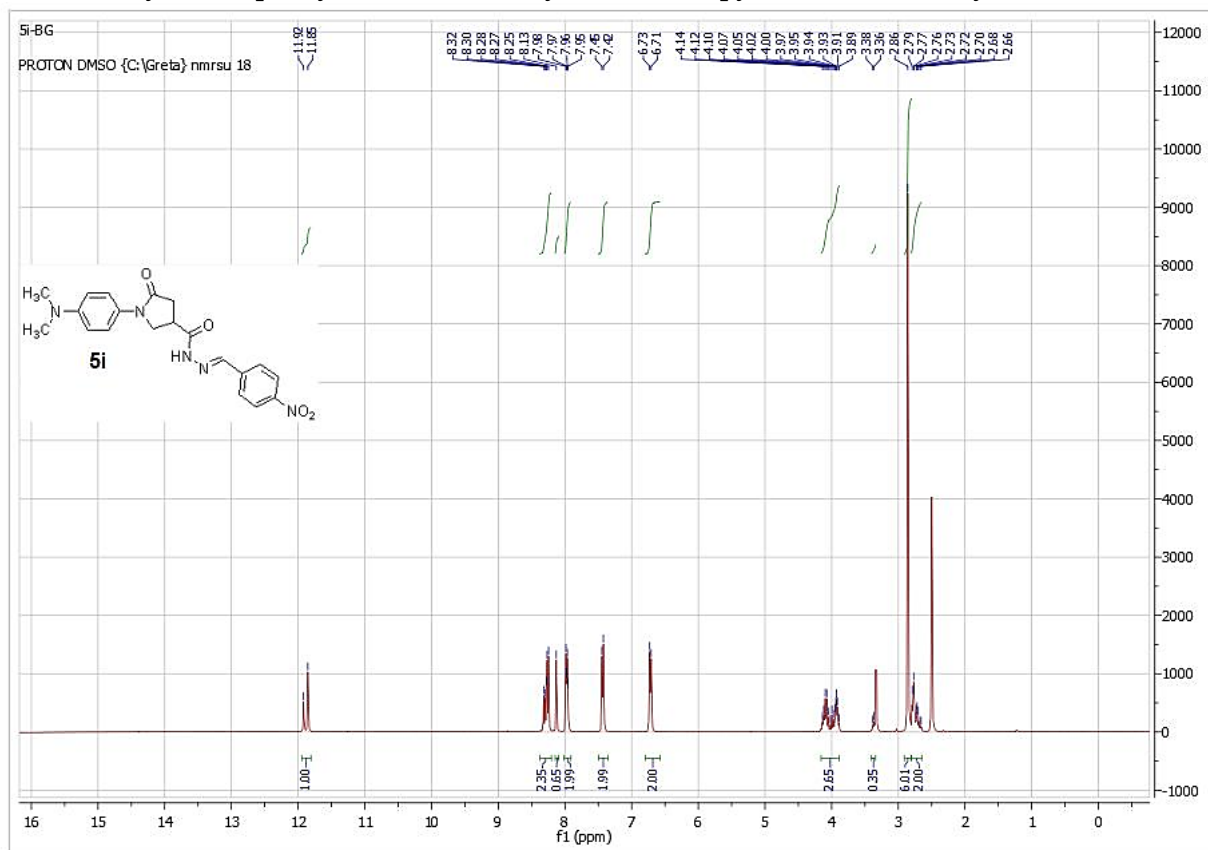

Figure S27. <sup>1</sup>H NMR spectrum of compound **5i**.

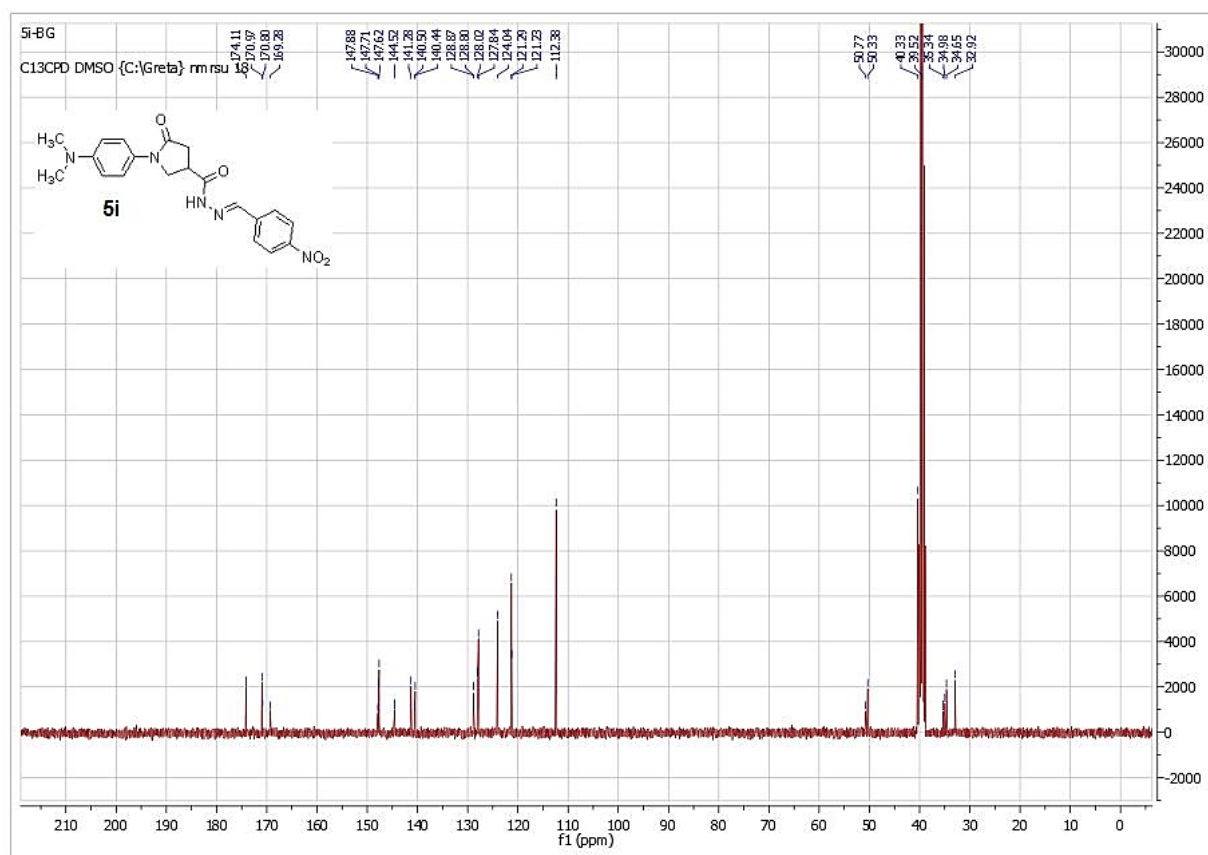

Figure S28. <sup>13</sup>C NMR spectrum of compound **5i**.

**1-(4-(Dimethylamino)phenyl)-5-oxo-N'-(thiophen-2-ylmethylene)pyrrolidine-3-carbohydrazide (5j)**

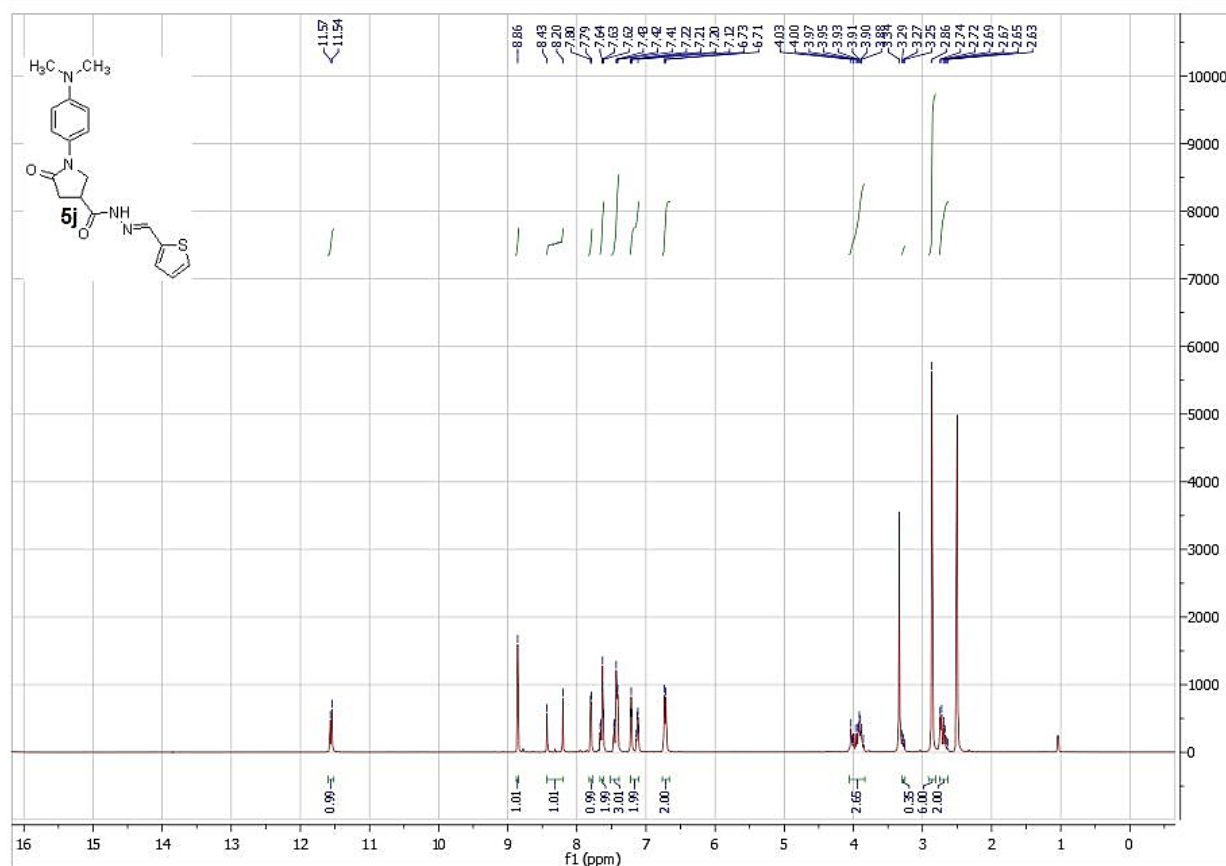

**Figure S29.** <sup>1</sup>H NMR spectrum of compound 5j.

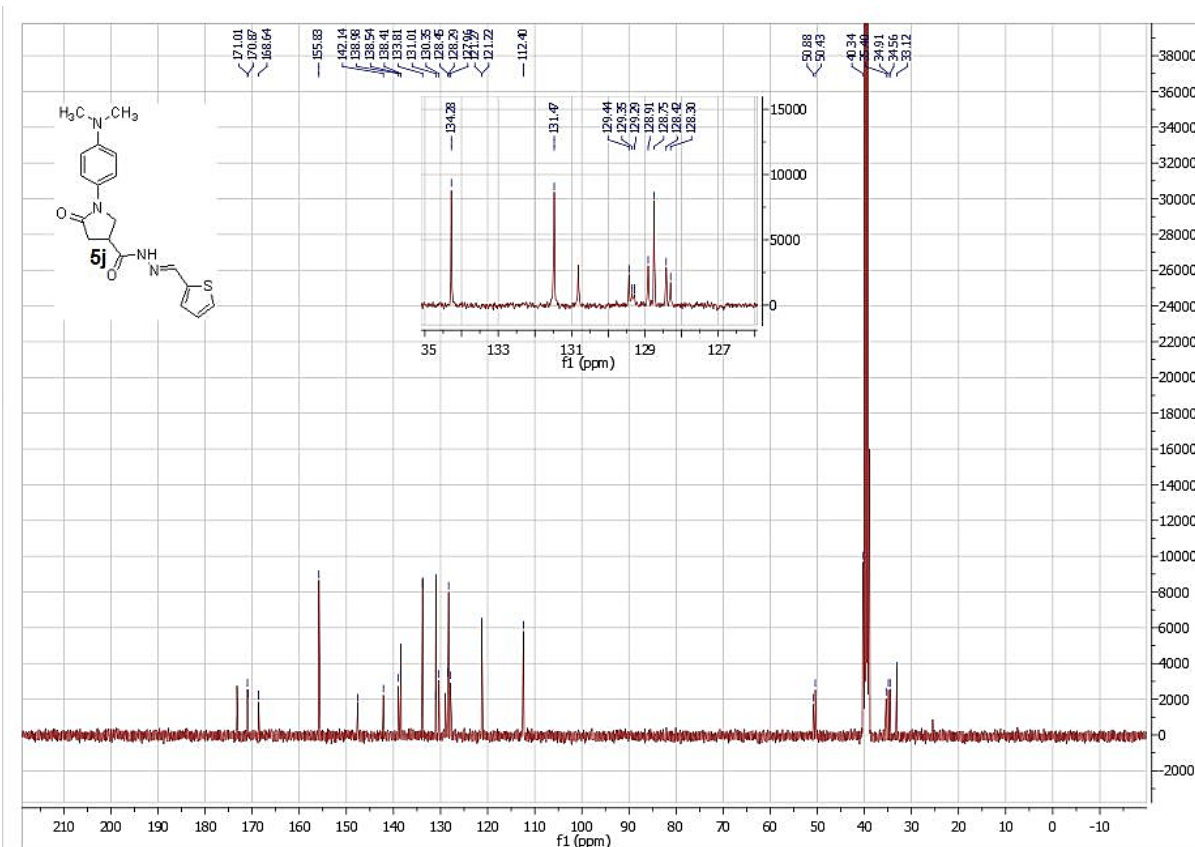

**Figure S30.** <sup>13</sup>C NMR spectrum of compound 5j.



1-(4-(Dimethylamino)phenyl)-N'-((5-nitrothiophen-2-yl)methylene)-5-oxopyrrolidine-3-carbohydrazide (**5k**)

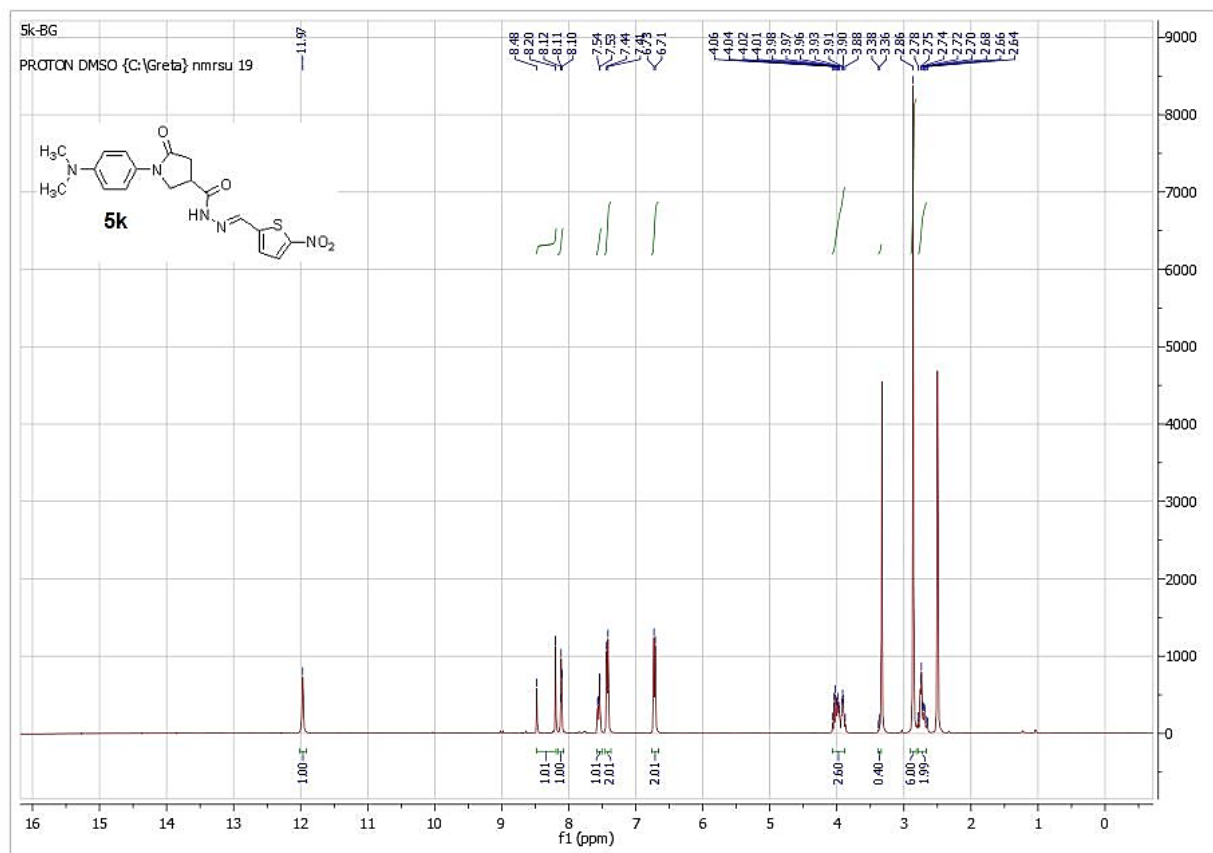

Figure S31. <sup>1</sup>H NMR spectrum of compound **5k**.

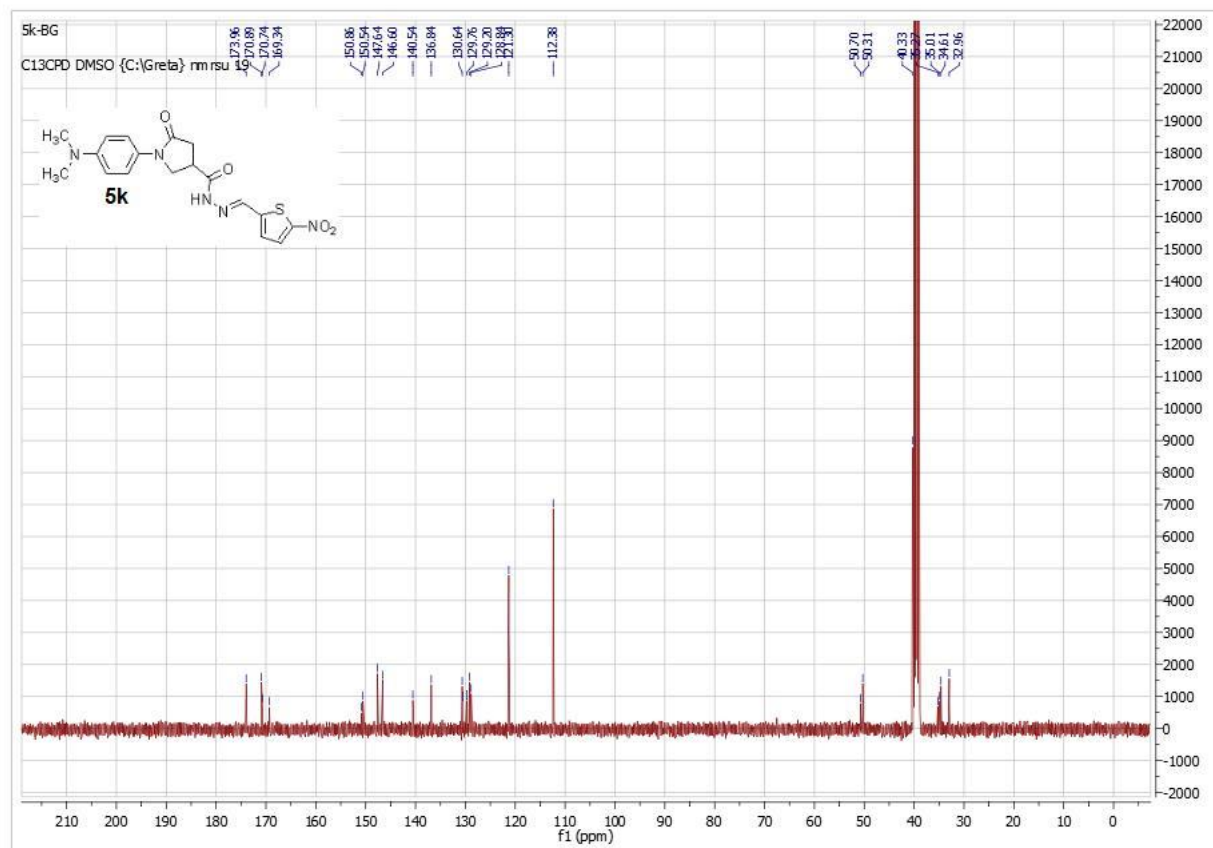

Figure S32. <sup>13</sup>C NMR spectrum of compound **5k**.

1-(4-(Dimethylamino)phenyl)-N'-(naphthalen-1-ylmethylene)-5-oxopyrrolidine-3-carbohydrazide (51)

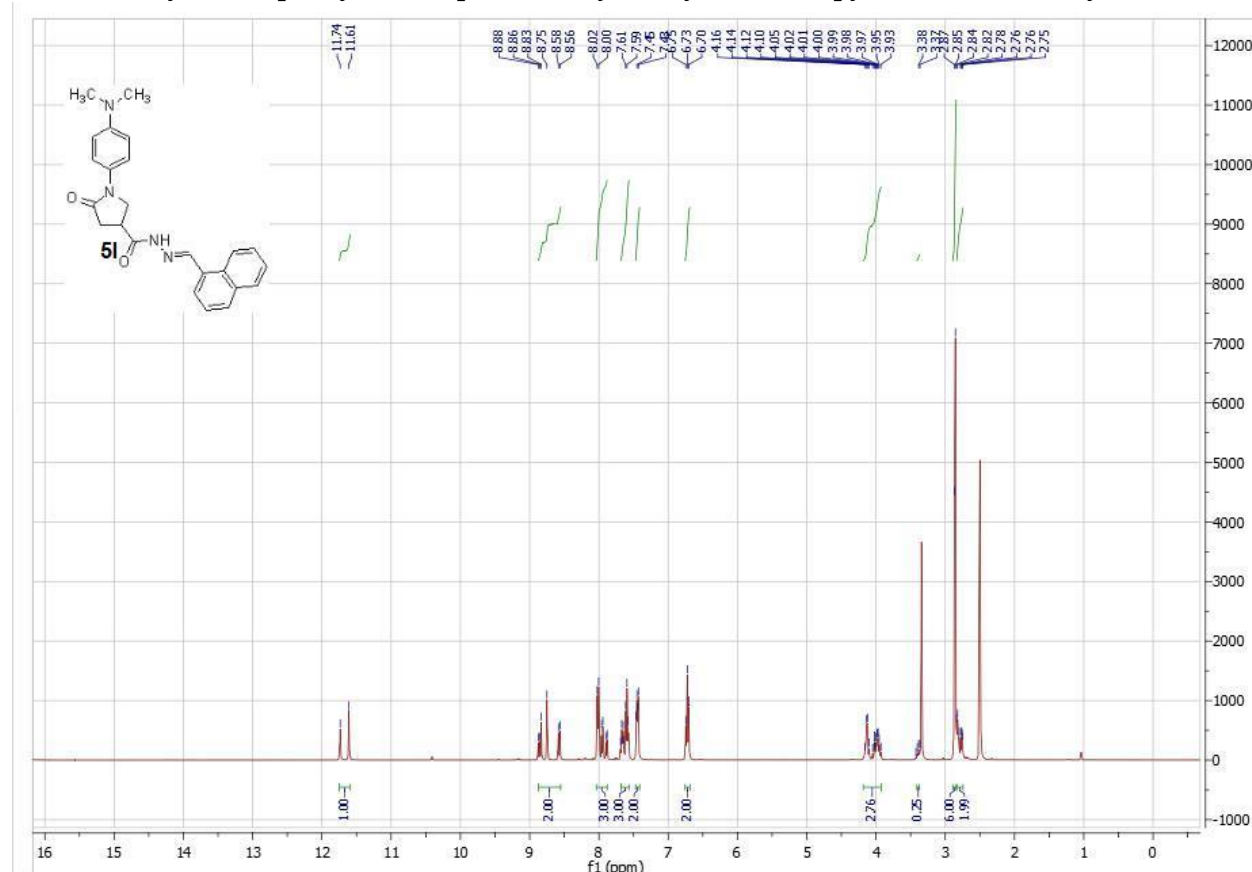

Figure S33. <sup>1</sup>H NMR spectrum of compound 51.

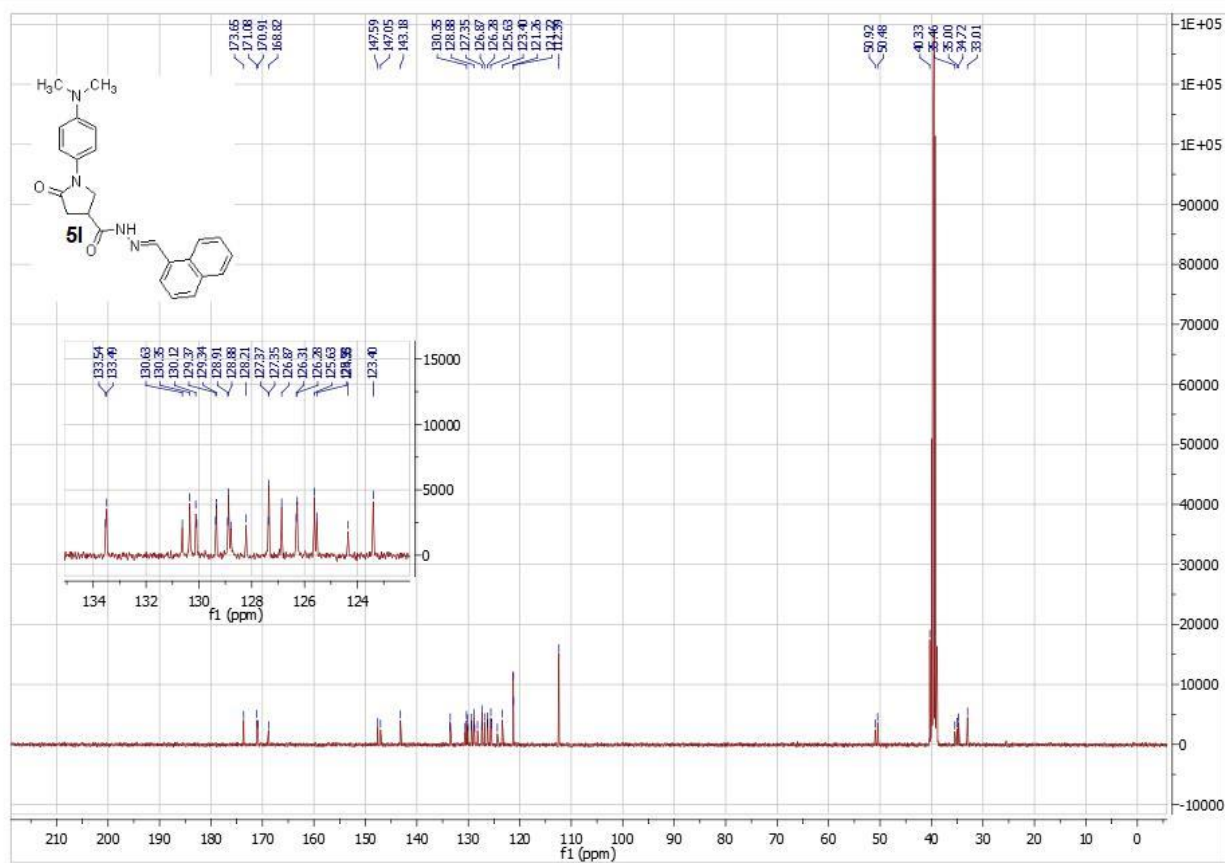

Figure S34. <sup>13</sup>C NMR spectrum of compound 51.

**1-(4-(Dimethylamino)phenyl)-5-oxo-N'-(propan-2-ylidene)pyrrolidine-3-carbohydrazide (6a)**

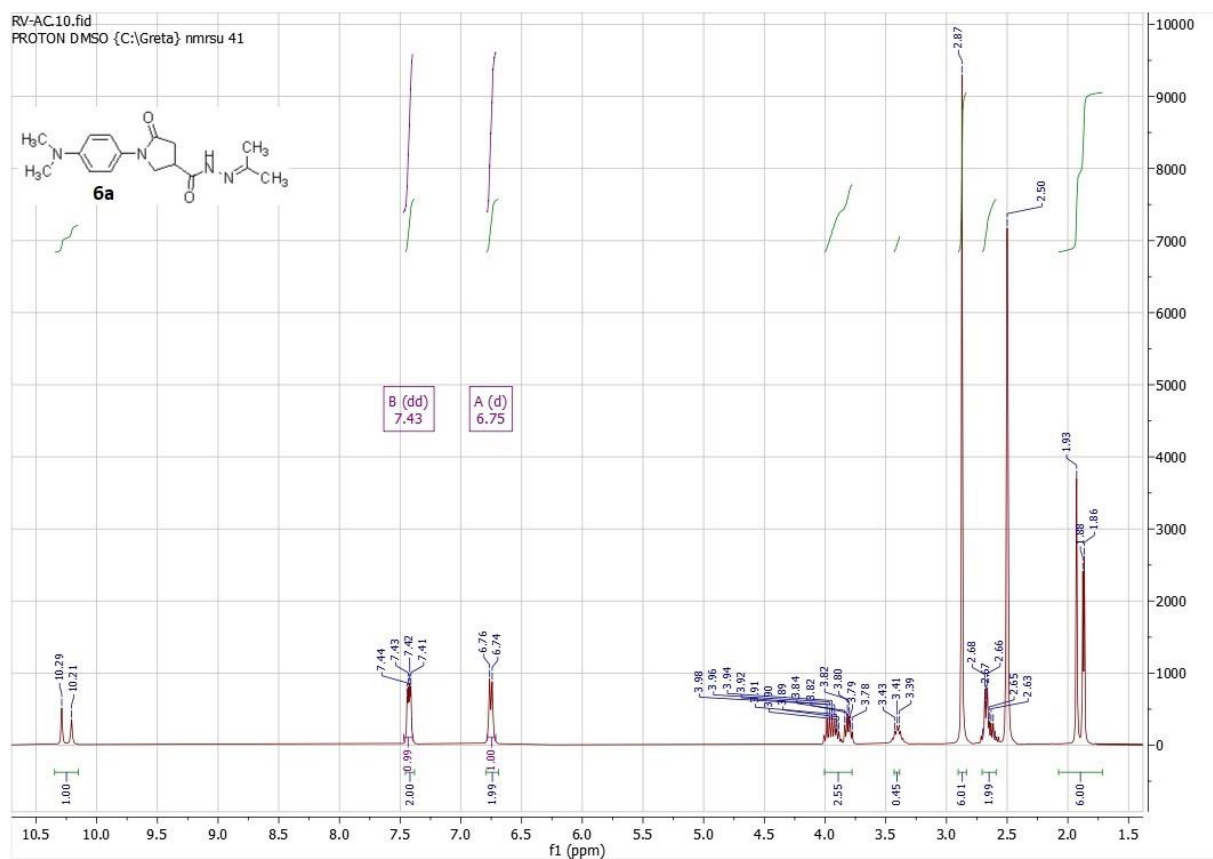

**Figure S35.**  $^1\text{H}$  NMR spectrum of compound **6a**.

*N'*-(butan-2-ylidene)-1-(4-(dimethylamino)phenyl)-5-oxopyrrolidine-3-carbohydrazide (**6b**)

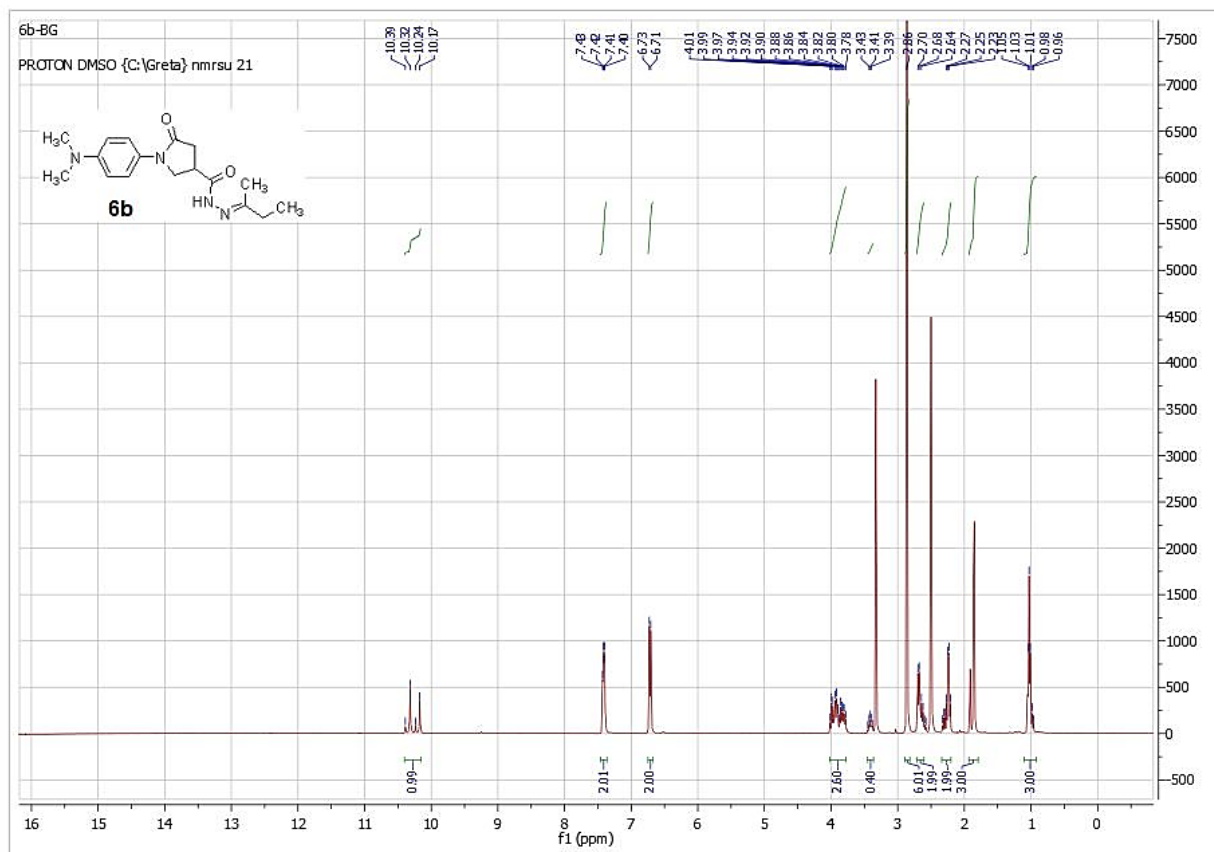

Figure S36. <sup>1</sup>H NMR spectrum of compound **6b**.

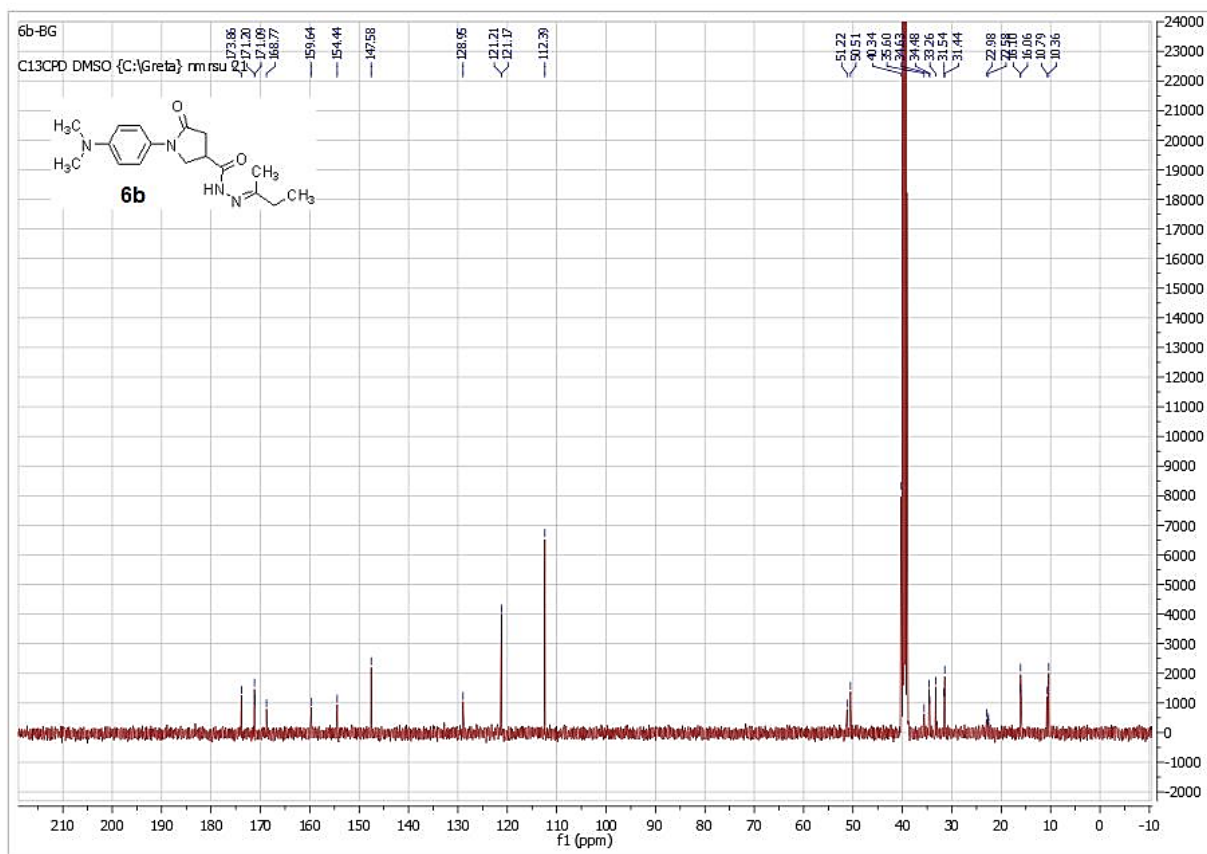

Figure S37. <sup>13</sup>C NMR spectrum of compound **6b**.

***N'*-(1-(4-aminophenyl)ethylidene)-1-(4-(dimethylamino)phenyl)-5-oxopyrrolidine-3-carbohydrazide (6c)**

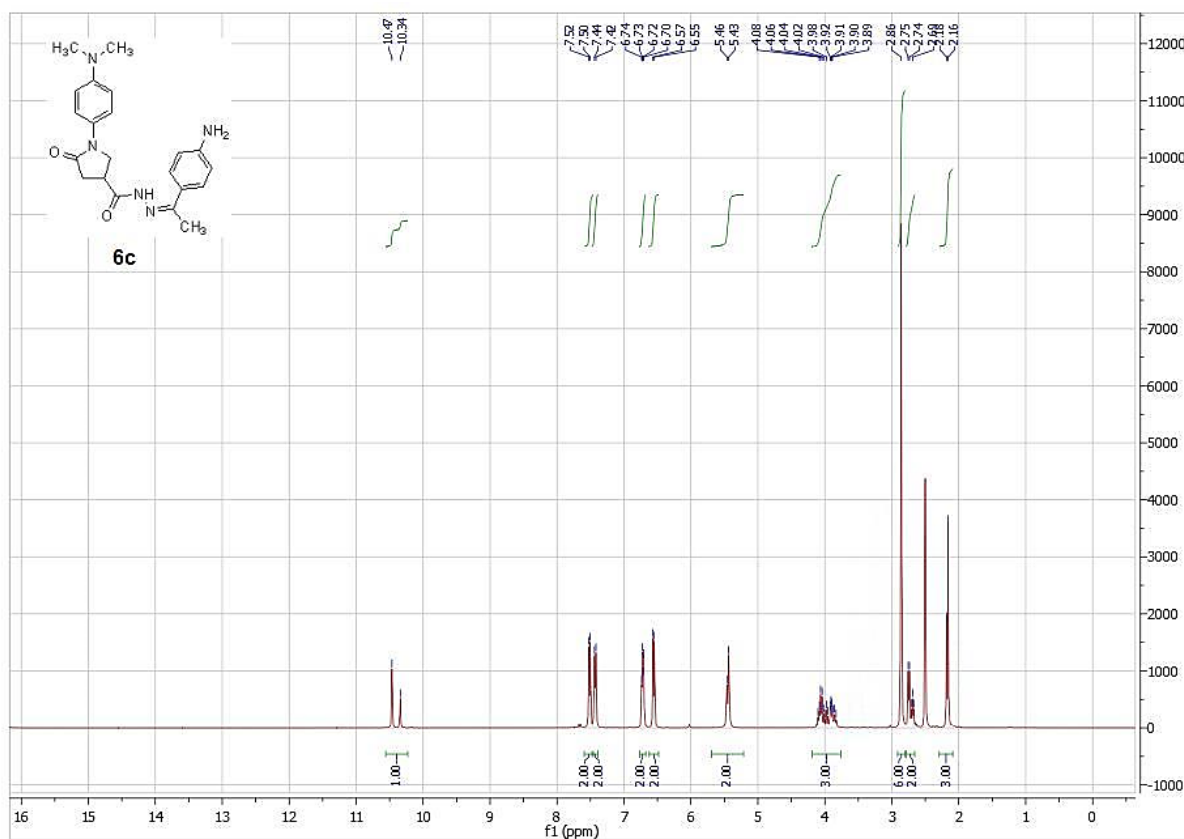

**Figure S38.** <sup>1</sup>H NMR spectrum of compound **6c**.

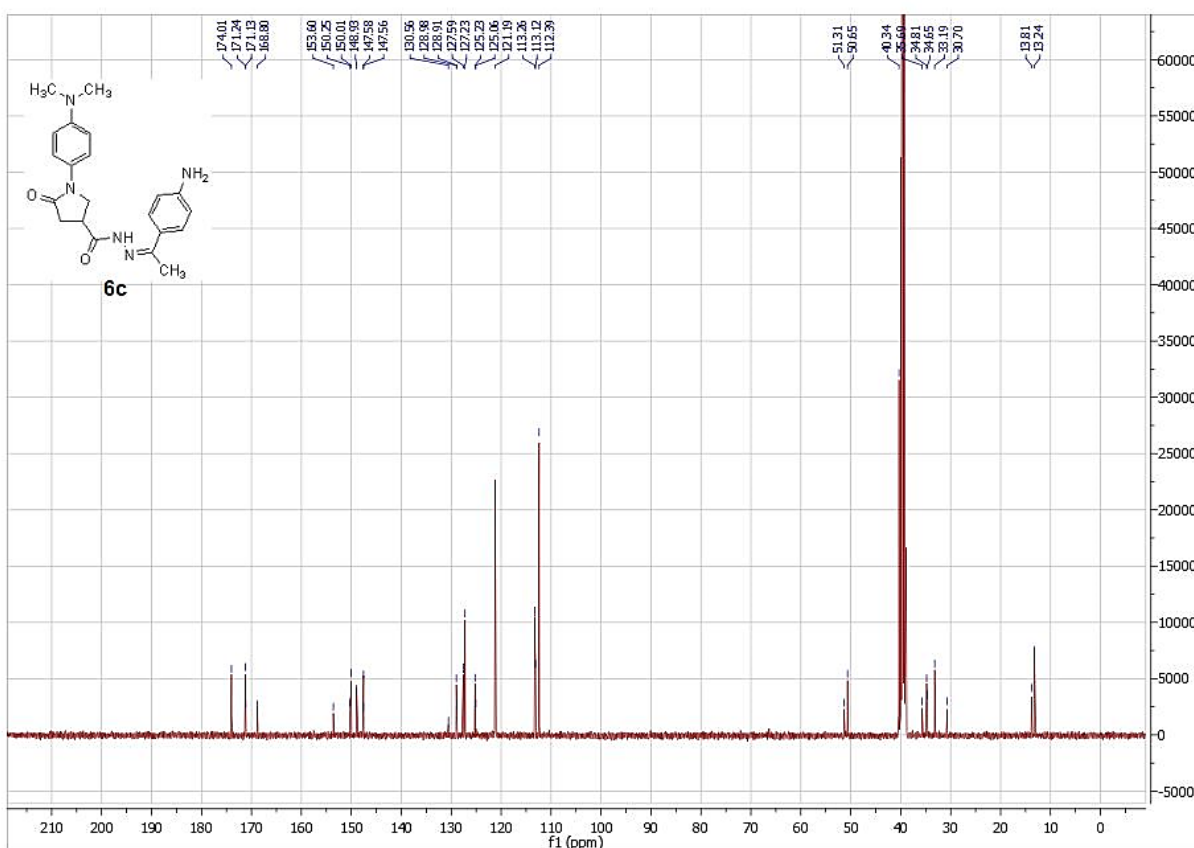

**Figure S39.** <sup>13</sup>C NMR spectrum of compound **6c**.

***N*-(2,5-dimethyl-1*H*-pyrrol-1-yl)-1-(4-(dimethylamino)phenyl)-5-oxopyrrolidine-3-carboxamide (7)**

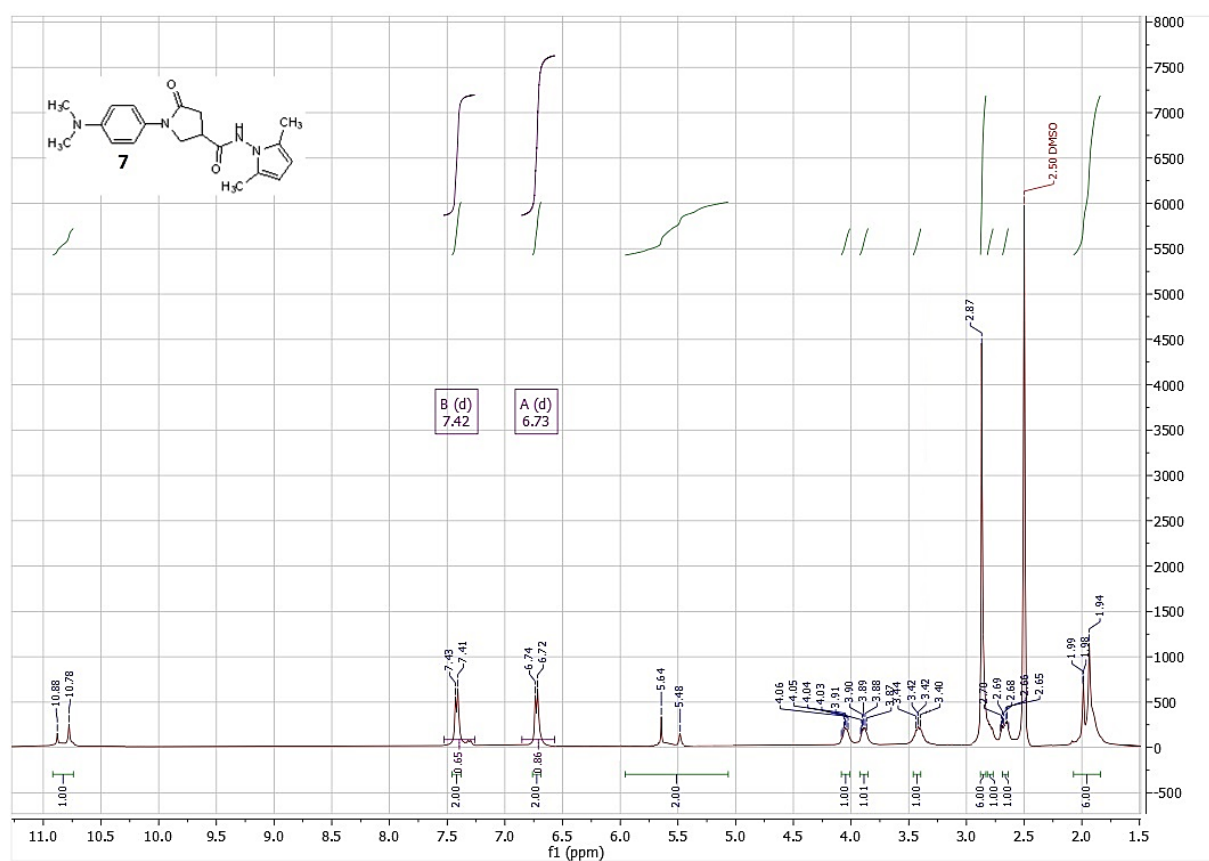

**Figure S40.** <sup>1</sup>H NMR spectrum of compound 7.

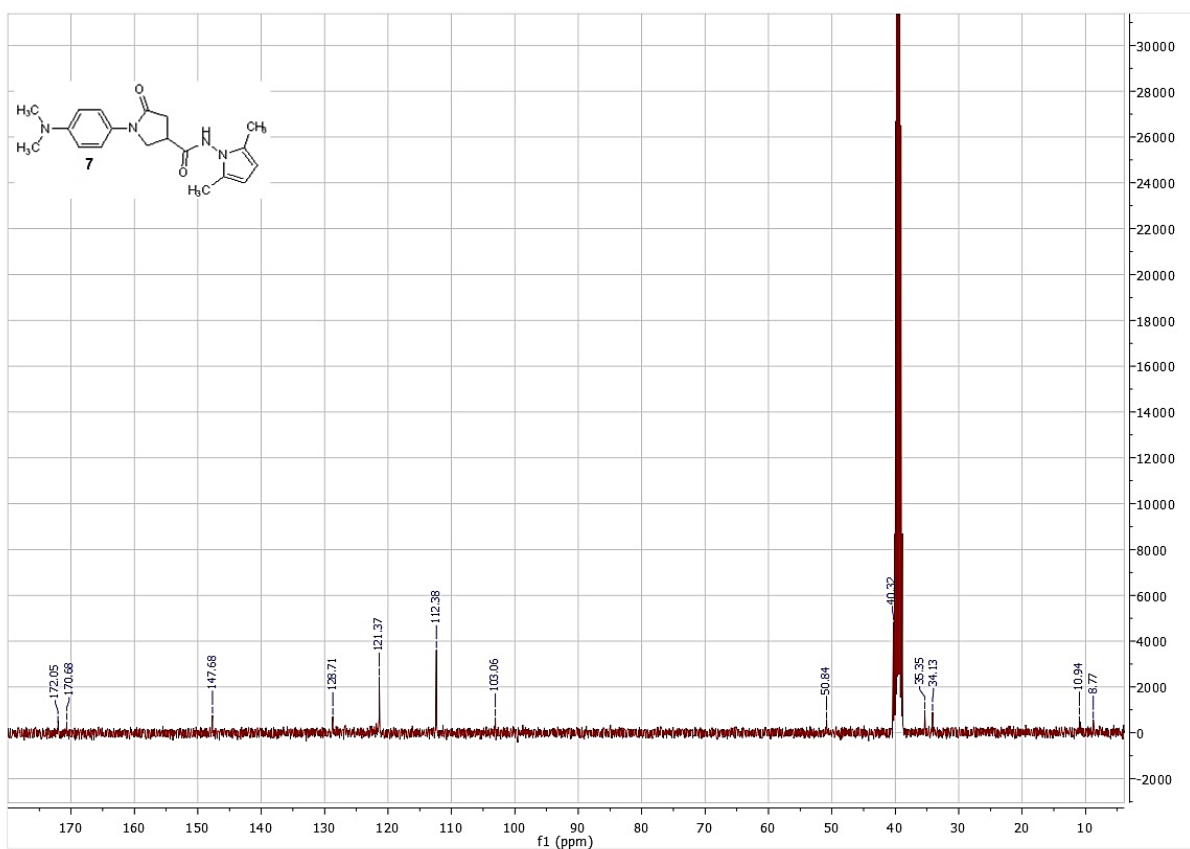

**Figure S41.** <sup>13</sup>C NMR spectrum of compound 7.



**1-(1-(4-(Dimethylamino)phenyl)-5-oxopyrrolidine-3-carboxamido)-5-oxopyrrolidine-3-carboxylic acid**  
(8)

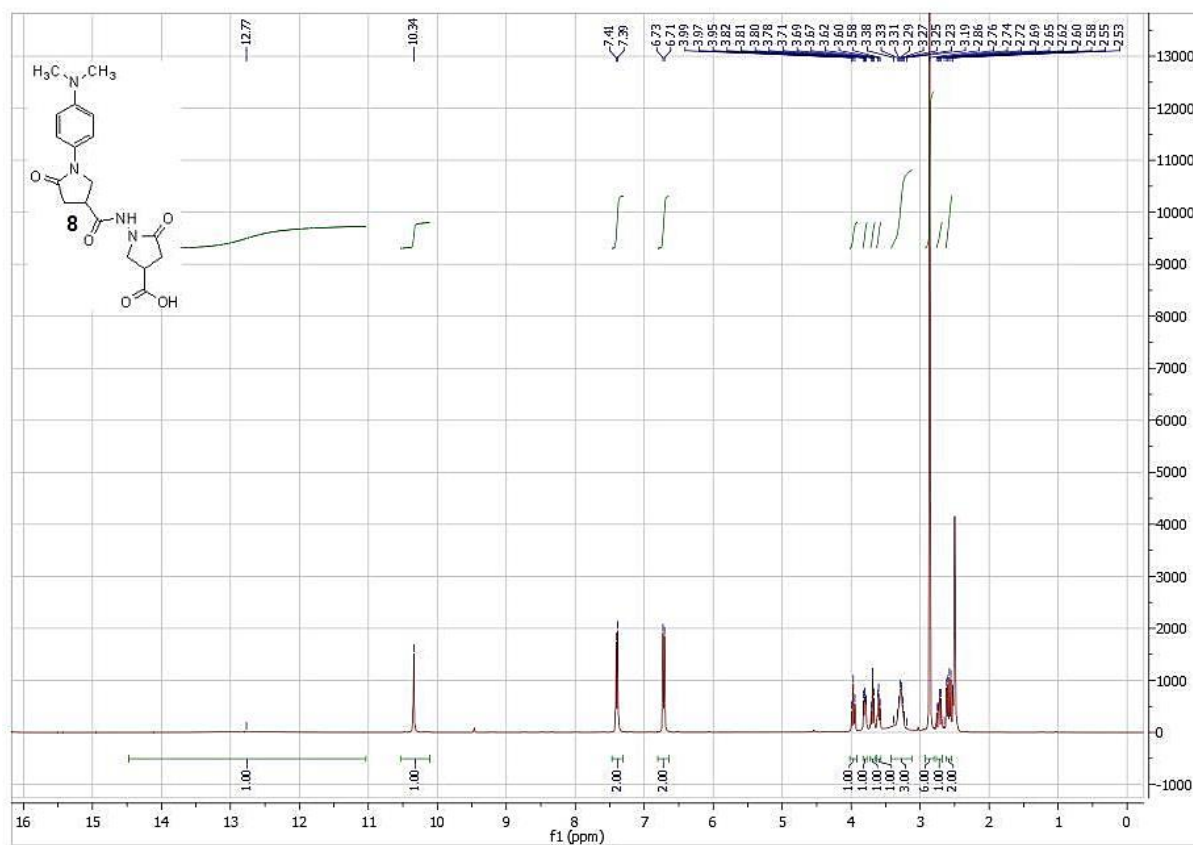

**Figure S42.**  $^1\text{H}$  NMR spectrum of compound 8.

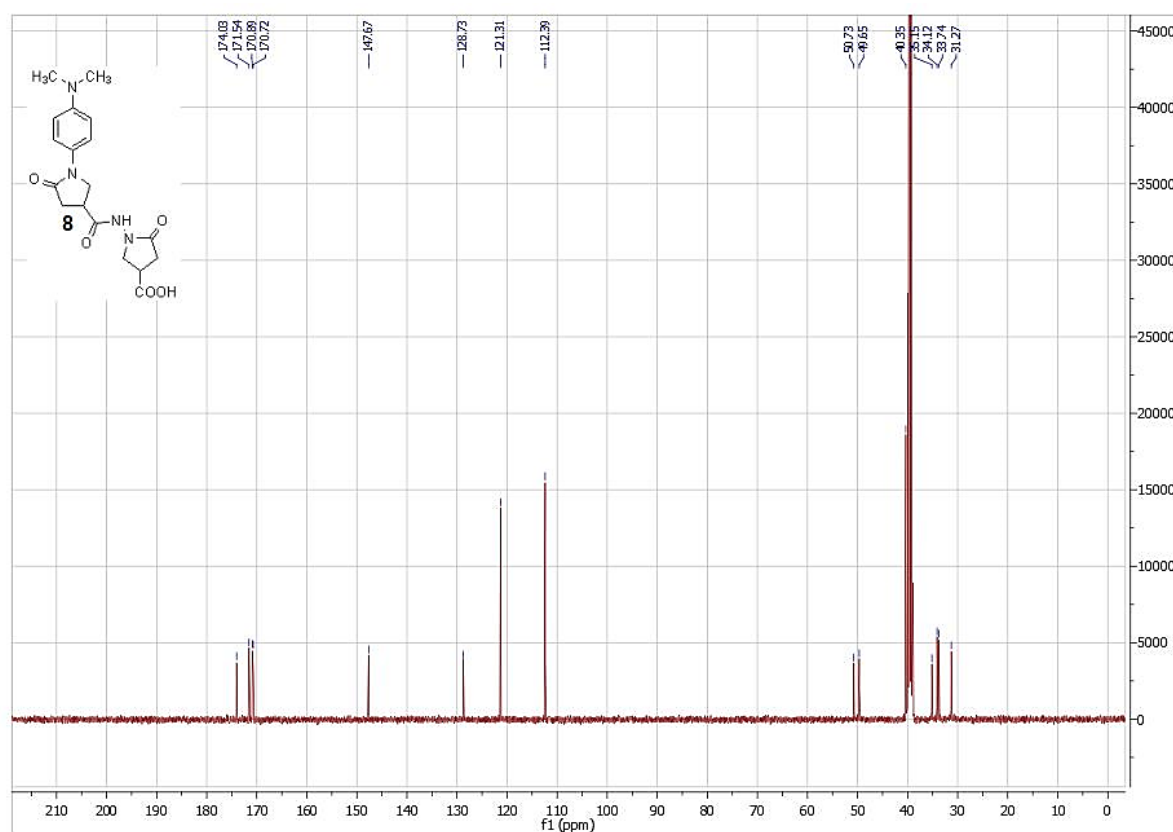

**Figure S43.**  $^{13}\text{C}$  NMR spectrum of compound 8.

1-(4-(Dimethylamino)phenyl)-5-oxo-N'-(2-oxoindolin-3-ylidene)pyrrolidine-3-carbohydrazide (9)

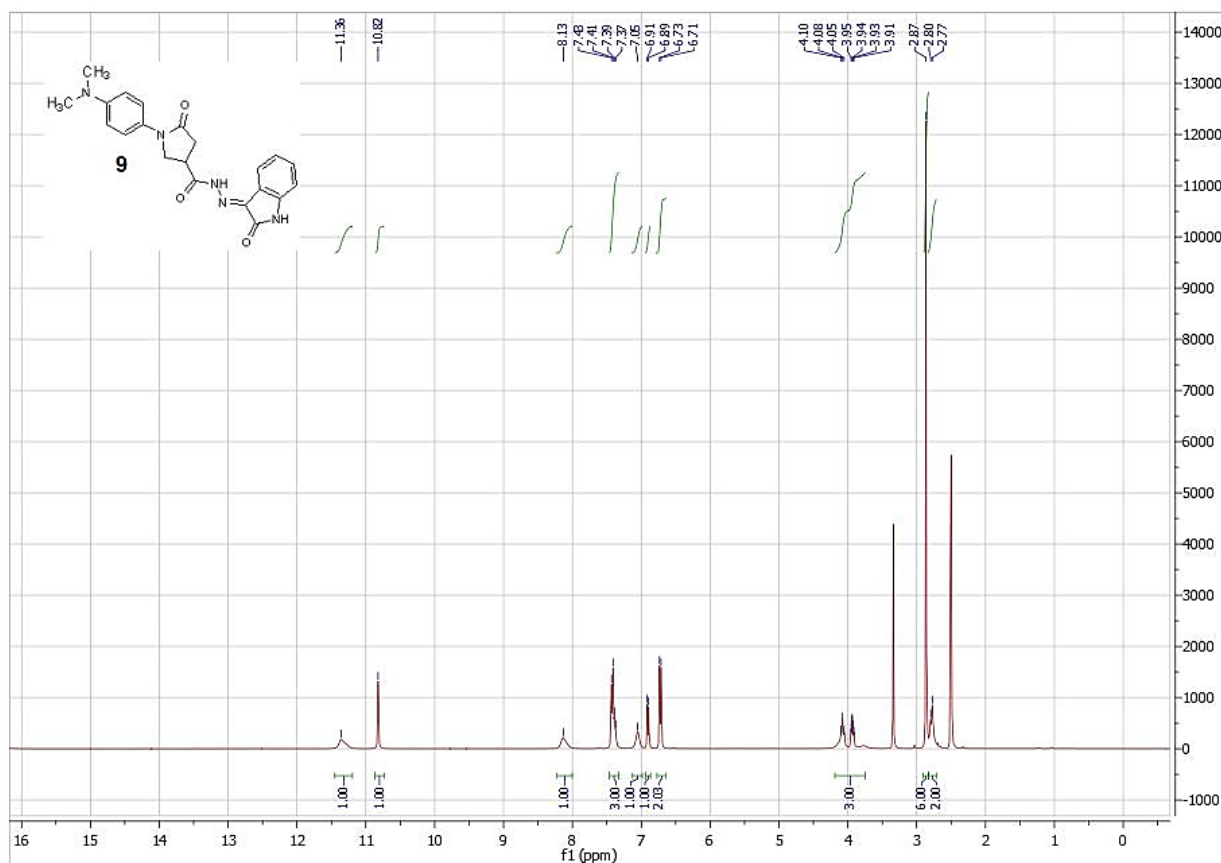

Figure S44. <sup>1</sup>H NMR spectrum of compound 9.

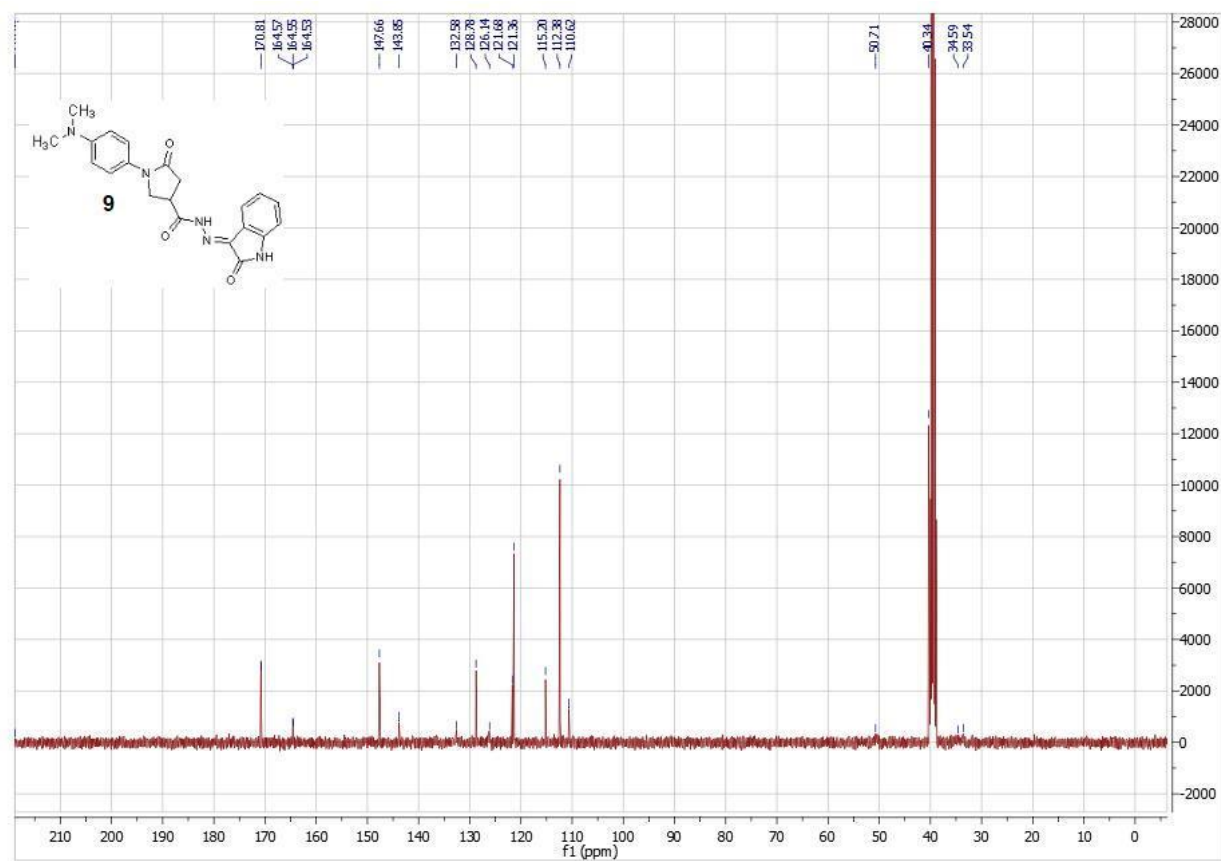

Figure S45. <sup>13</sup>C NMR spectrum of compound 9.



1-(4-(Dimethylamino)phenyl)-4-(5-thioxo-4,5-dihydro-1,3,4-oxadiazol-2-yl)pyrrolidin-2-one (10)

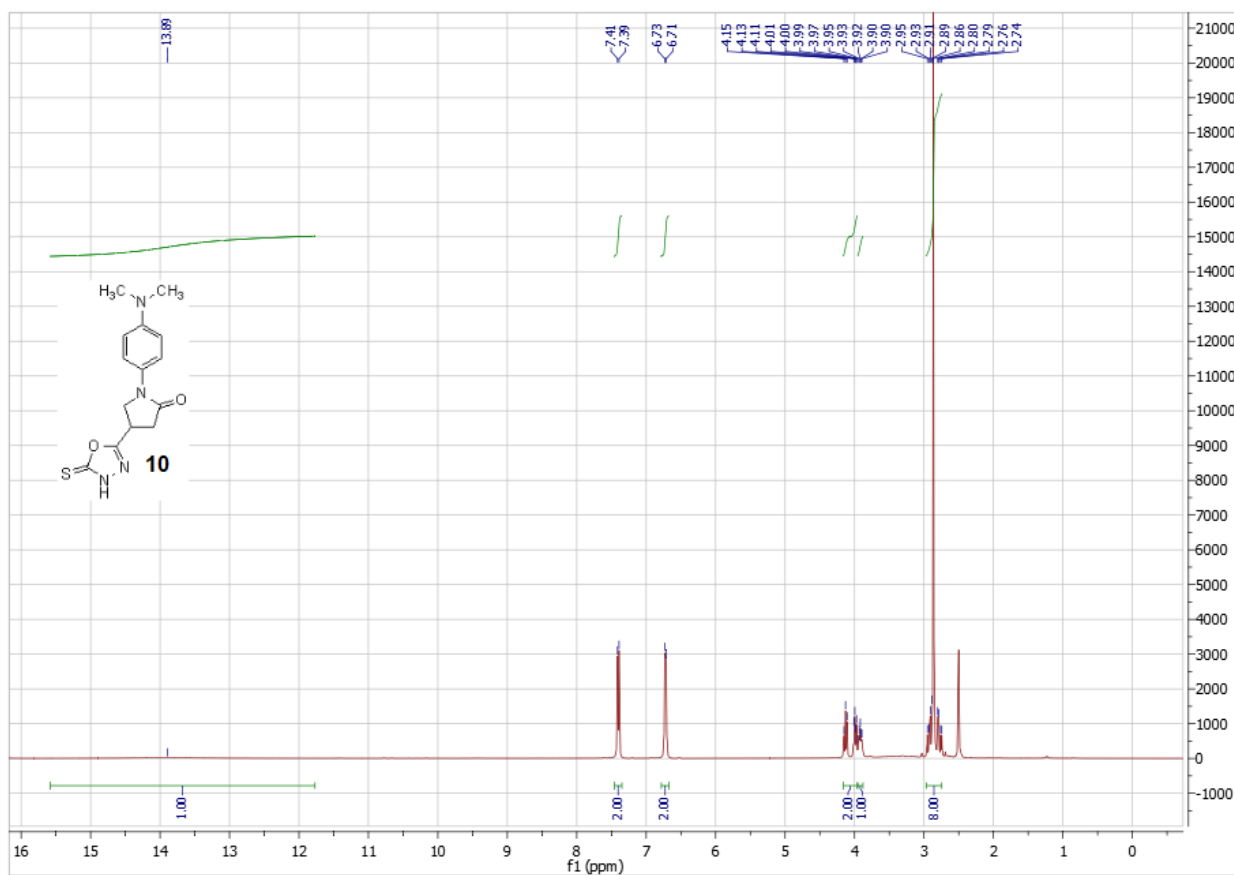

Figure S46.  $^1\text{H}$  NMR spectrum of compound 10.

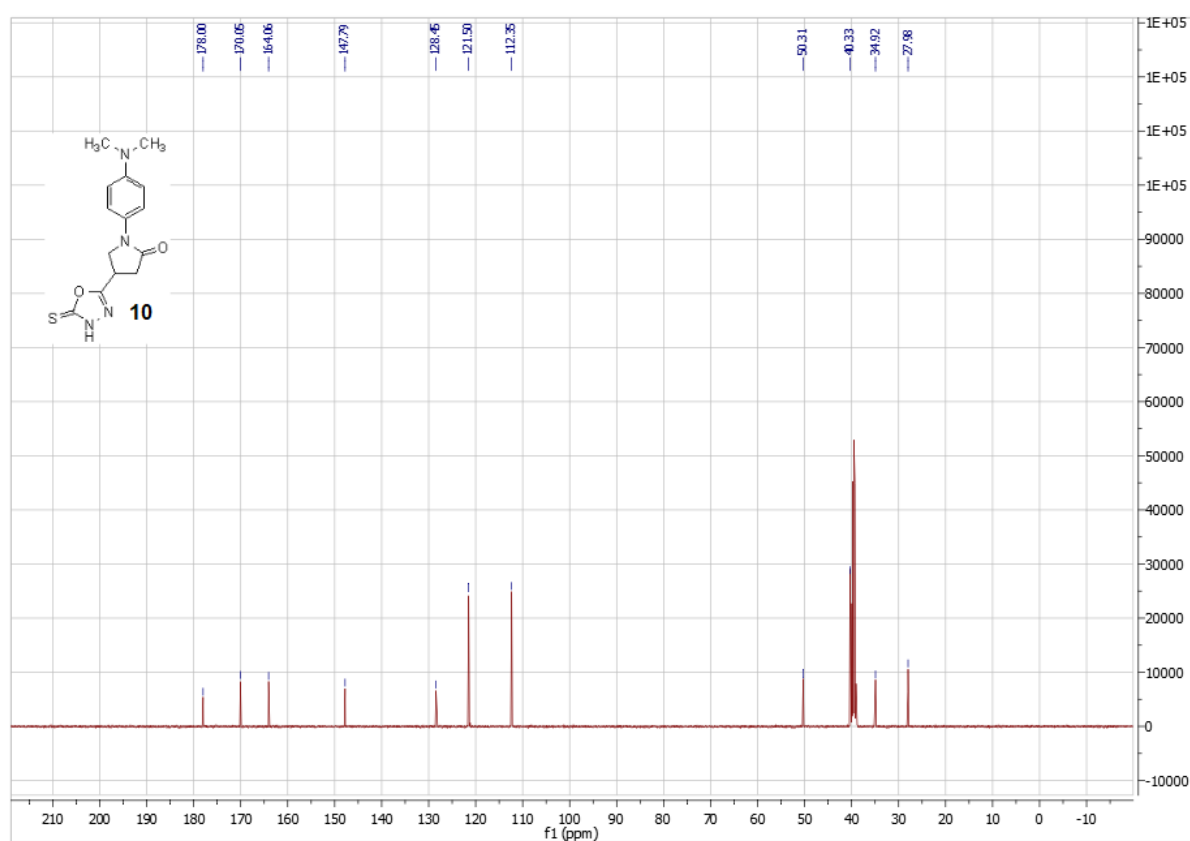

Figure S47.  $^{13}\text{C}$  NMR spectrum of compound 10.

1-(4-(Dimethylamino)phenyl)-4-(5,6-diphenyl-1,2,4-triazin-3-yl)pyrrolidin-2-one (11)

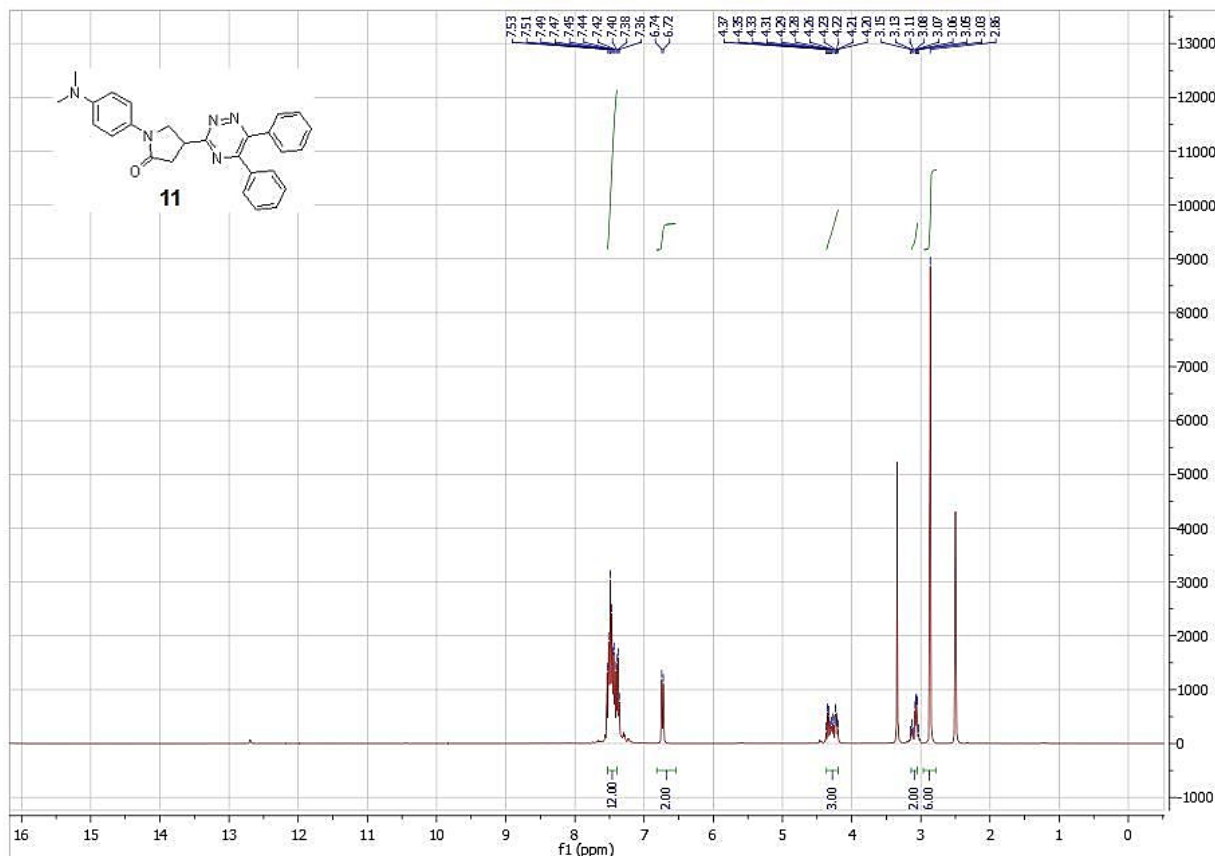

Figure S48. <sup>1</sup>H NMR spectrum of compound 11.

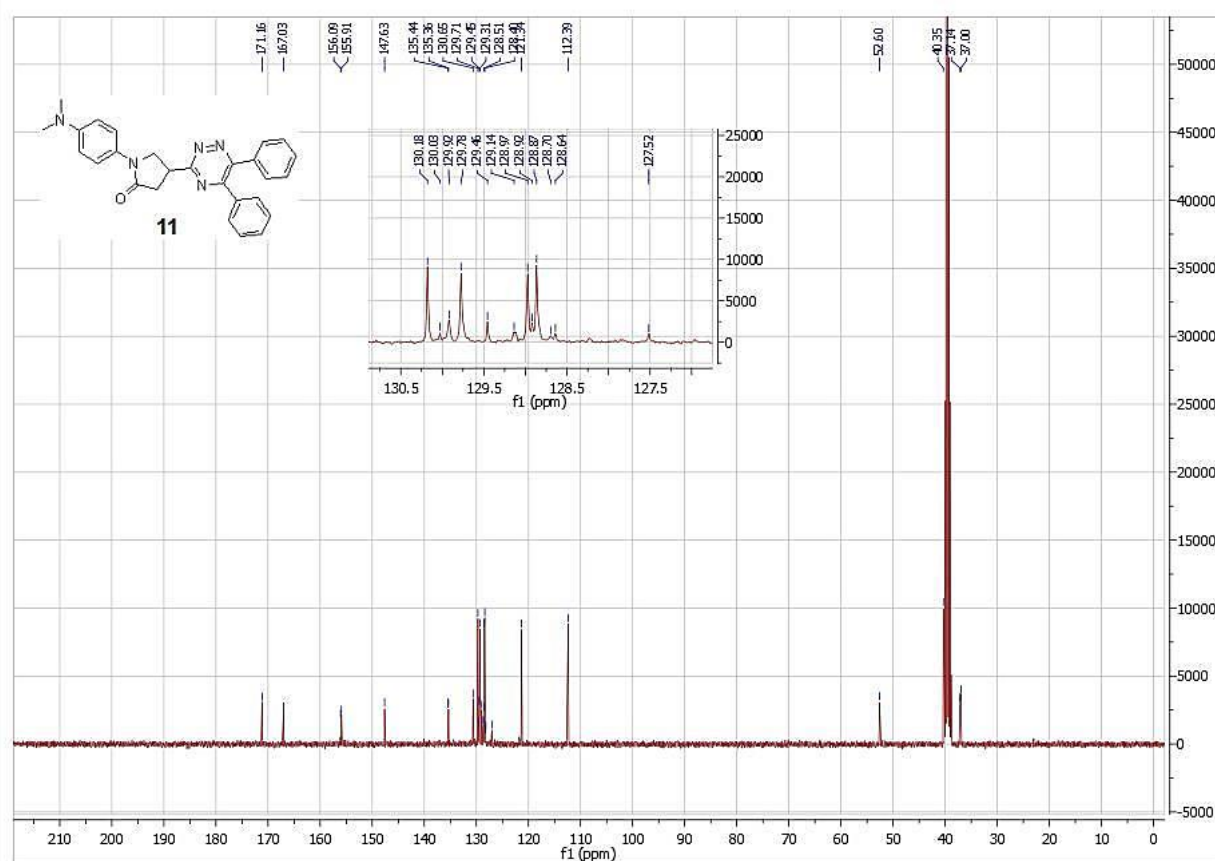

Figure S49. <sup>13</sup>C NMR spectrum of compound 11.
